1        **Structure and function of BcpE2, the most promiscuous GH3-**  
2        **family beta-glucosidase for scavenging glucose from heterosides**

3

4        Benoit Deflandre<sup>1</sup>, Cédric Jadot<sup>1</sup>, Sören Planckaert<sup>2</sup>, Noémie Thiébaud<sup>1</sup>, Nudzejma  
5        Stulanovic<sup>1</sup>, Raphaël Herman<sup>1</sup>, Bart Devreese<sup>2</sup>, Frédéric Kerff<sup>1,†</sup>, and Sébastien Rigali<sup>1,†,\*</sup>

6

7        <sup>1</sup> InBioS – Center for Protein Engineering, Institut de Chimie B6a, University of Liège, Liège,  
8        Belgium

9        <sup>2</sup> Laboratory for Microbiology, Department of Biochemistry and Microbiology, Ghent  
10        University, Ghent, Belgium

11        †These authors jointly supervised this work.

12        \*Corresponding author: srigali@uliege.be

13

14        Keywords: Enzyme promiscuity; GH3 family beta-glycosidase; host pathogen interaction;  
15        plant heterosides; carbon metabolism

## 16 **Abstract**

17 Cellulose being the most abundant polysaccharide on earth, beta-glucosidases hydrolyzing  
18 cello-oligosaccharides are key enzymes to fuel glycolysis in microorganisms developing on  
19 plant material. In *Streptomyces scabiei*, the causative agent of common scab in root and tuber  
20 crops, a genetic compensation phenomenon safeguards the loss of the gene encoding the cello-  
21 oligosaccharide hydrolase BglC by awakening the expression of alternative beta-glucosidases.  
22 Here we reveal that the BglC compensating enzyme BcpE2 is the GH3-family beta-glucosidase  
23 that displays the highest reported substrate promiscuity able to release the glucose moiety of all  
24 tested types of plant-derived heterosides (aryl  $\beta$ -glucosides, monolignol glucosides, cyanogenic  
25 glucosides, anthocyanosides, and coumarin heterosides). BcpE2 structure analysis highlighted  
26 a large cavity in the PA14 domain that covers the active site, and the high flexibility of this  
27 domain would allow proper adjustment of this cavity for disparate heterosides. The exceptional  
28 substrate promiscuity of BcpE2 provides microorganisms a versatile tool for scavenging  
29 glucose from plant-derived nutrients that widely vary in size and structure. Importantly,  
30 scopolin is the only substrate commonly hydrolyzed by both BglC and BcpE2 thereby  
31 generating the potent virulence inhibitor scopoletin. Next to fueling glycolysis, both enzymes  
32 thus also interfere with the plant defense mechanisms to fine-tune the strength of virulence.

33

## 34 Introduction

35 The major source of soil organic carbon derives from plant senescence, with cellulose, xylan,  
36 starch, and lignin being the most abundant naturally-occurring carbon-containing polymers.  
37 Optimal colonization of carbon rich environments thus mainly relies on the ability of  
38 microorganisms to participate and feed on decomposing plant biomass. The same rationale  
39 applies to phytopathogenic bacteria for which the energy required for plant colonization must  
40 be supported by catabolic pathways biased for carbon sources utilization. Filamentous Gram-  
41 positive bacteria of the genus *Streptomyces* are well-known for their role in soil mineralization  
42 and their capability to consume diverse poly-, oligo-, and monosaccharides<sup>1-4</sup>. Cellulose being  
43 the most abundant polysaccharide on earth, the acquisition of a complete cellulolytic system  
44 provides a competitive advantage in organic environments. However, as cellobiose is the main  
45 product resulting from cellulolysis<sup>5,6</sup>, possessing the CebEFG-MsiK cello-oligosaccharide  
46 transporter<sup>7-9</sup> and the beta-glucosidase BglC<sup>10,11</sup> for their subsequent hydrolysis into glucose,  
47 would be a sufficient requirement for the survival of streptomycetes within a microbial  
48 community consuming plant material<sup>2</sup>.

49 For *Streptomyces scabiei*, the bacterium responsible for common scab in root and tuber crops,  
50 cellobiose and cellotriose are of particular importance. Indeed, their import and subsequent  
51 catabolism do not only feed glycolysis with glucose, but they are also the environmental triggers  
52 of the onset of its pathogenic lifestyle<sup>7,12-17</sup>. This tight link of cellulose byproduct utilization  
53 for both primary metabolism and the onset of virulence is perfectly highlighted by the  
54 phenotype of the null mutant of gene *scab57721* encoding the  $\beta$ -glucosidase BglC. Indeed,  
55 strain *S. scabiei*  $\Delta$ *bglC* poorly grows when cultured with cellobiose or cellotriose provided as  
56 sole carbon sources, and also displays a hypervirulent phenotype due to the constitutive  
57 production of thaxtomin A, the main virulence determinant<sup>10</sup>. Surprisingly, we recently showed  
58 that BglC is also able to remove the glucose moiety of the scopolin heteroside<sup>18</sup> produced by  
59 plants under host colonization thereby generating scopoletin, a potent inhibitor of thaxtomin A  
60 production<sup>19</sup>. The hydrolysis of scopolin by BglC displays a substrate inhibition kinetic profile  
61<sup>18</sup> that contrasts with the typical Michaelis–Menten saturation curve observed for the  
62 degradation of its natural substrates cellotriose and cellobiose<sup>10</sup>. At low concentration, the  
63 scopolin and cellobiose/cellotriose degradation would synergistically reduce thaxtomin A  
64 production and or feed glycolysis, while at higher concentrations the activities on both  
65 substrates would instead activate the biosynthesis of this main virulence factor. This enzyme

66 has thus different kinetic properties on either the virulence elicitors emanating from the plant  
67 host or a molecule produced by the plant defense mechanisms, thereby occupying a key position  
68 to fine-tune the production of thaxtomin A<sup>18</sup>.

69 Surprisingly, we showed that the deletion of *bglC* in *S. scabiei* is not lethal when the mutant  
70 strain is inoculated on media with cellobiose supplied as unique carbon source<sup>20</sup>. The  
71 unexpected survival of the *bglC* null mutant in this culture condition is due to a genetic  
72 compensation phenomenon that awakens the expression of the gene *scab2391* encoding an  
73 alternative GH1-family  $\beta$ -glucosidase<sup>20</sup>. This sugar hydrolase was called BcpE1 (SCAB\_2391),  
74 BcpE standing for BglC compensating enzyme, and is a paralogue of BglC, both enzymes  
75 having catalytic properties in the same order of magnitude towards cellobiose<sup>20</sup>. Interestingly,  
76 the genetic compensation phenomenon associated with the loss of *bglC* resulted in the  
77 overexpression of a second gene (*scab64101*) encoding a GH3-family  $\beta$ -glucosidase called  
78 BcpE2<sup>20</sup>. However, in contrast to BcpE1, BcpE2 cannot hydrolyze cellobiose<sup>20</sup> and therefore  
79 the reason why the *bglC*-dependent mechanism of compensation selected the product of  
80 *scab64101* as alternative  $\beta$ -glucosidase remained unknown. If the role of BcpE2 is not to  
81 provide glucose from cellobiose or cellotriose, how could this enzyme compensate for the loss  
82 of function of BglC? In other words, how would *S. scabiei* and other streptomycetes benefit  
83 from the activation of BcpE2 in their environmental niche?

84 In this work we investigated through enzymatic, structural, and expression studies the function  
85 of BcpE2. Our results demonstrate that BcpE2 is able to release the glucose moiety of various  
86 types of plant-derived heterosides. Thanks to its exceptional substrate promiscuity, BcpE2  
87 safeguards the feeding of glycolysis with glucose hydrolyzed from highly diverse carbon  
88 sources. Moreover, BcpE2 also degrades scopolin into scopoletin following a substrate  
89 inhibition profile, thereby also compensating for the loss of the function of BglC towards the  
90 host defense mechanism.

91

## 92 Results

### 93 Structure of BcpE2 of *Streptomyces scabiei*

94 We obtained the crystallographic structure of BcpE2 at 3.09 Å. The crystal belongs to the P3<sub>1</sub>21  
95 space group with one molecule in the asymmetric unit. The BcpE2 structure is characterized by  
96 R<sub>work</sub> and R<sub>free</sub> values of 22.3% and 27% respectively (Table S1) and contains residues 10 to  
97 822. Six regions could not be built because of a lack of electron density: the first nine amino  
98 acids (AA)-, the twelve C-terminal residues, which consist in a His<sub>6</sub>-Tag and a linker, and four  
99 loops (residues 70 to 73, 336 to 339, 436 to 443 and 531 to 536). BcpE2 is monomeric and is  
100 made of four domains (Figure 1a, Table S1): an N-terminal (β/α)<sub>8</sub> TIM barrel domain (residues  
101 10–306), an (α/β)<sub>6</sub>-sandwich domain (residues 316–398 and 551–650), a PA14 domain  
102 (residues 404–548), and a C-terminal fibronectin type III-like (fn3) domain (residues 711–821).  
103 In addition, a 60 AA linker is present between (α/β)<sub>6</sub>-sandwich and the fibronectin type III-like  
104 domains and mostly runs on the (β/α)<sub>8</sub> TIM barrel domain. This architecture was identified in  
105 only 19 sequences among all 199 characterized prokaryotic and eukaryotic GH3s by mining the  
106 CAZy database. Only two structures, KmBglI from *Kluyveromyces marxianus* (PDB code  
107 3AC0)<sup>21</sup>, and DesR from *Streptomyces venezuelae* (PDB code 4I3G)<sup>22</sup> were found with this  
108 architecture. While the (β/α)<sub>8</sub> TIM barrel, the (α/β)<sub>6</sub>-sandwich, and the fn3 domains are very  
109 well superimposed, including the linker preceding the C-terminal domain (rmsd of 0.91 Å over  
110 507 Cα for KmBglI and 0.90 Å over 504 Cα for DesR), the PA14 domain cannot be  
111 superimposed simultaneously with the three other domains (Figure 1bc). In BcpE2 and KmBglI,  
112 the orientation is roughly similar, and they are characterized by a rmsd of 2.6 Å over 81 Cα  
113 when superimposed independently. In DesR, the PA14 domain is 40 AA shorter than in BcpE2  
114 and approximately perpendicular to the orientation in the latter. When superimposed  
115 independently, the rmsd between them is 4.7 Å over 88 Cα. The PA14 domain of BcpE2 is also  
116 characterized by B factor values significantly higher than the rest of the protein, particularly in  
117 the active site vicinity (Figure 1d), indicating a likely flexibility of this domain. This feature  
118 was also noted for KmBglI and potentially associated with substrate recognition<sup>21</sup>.

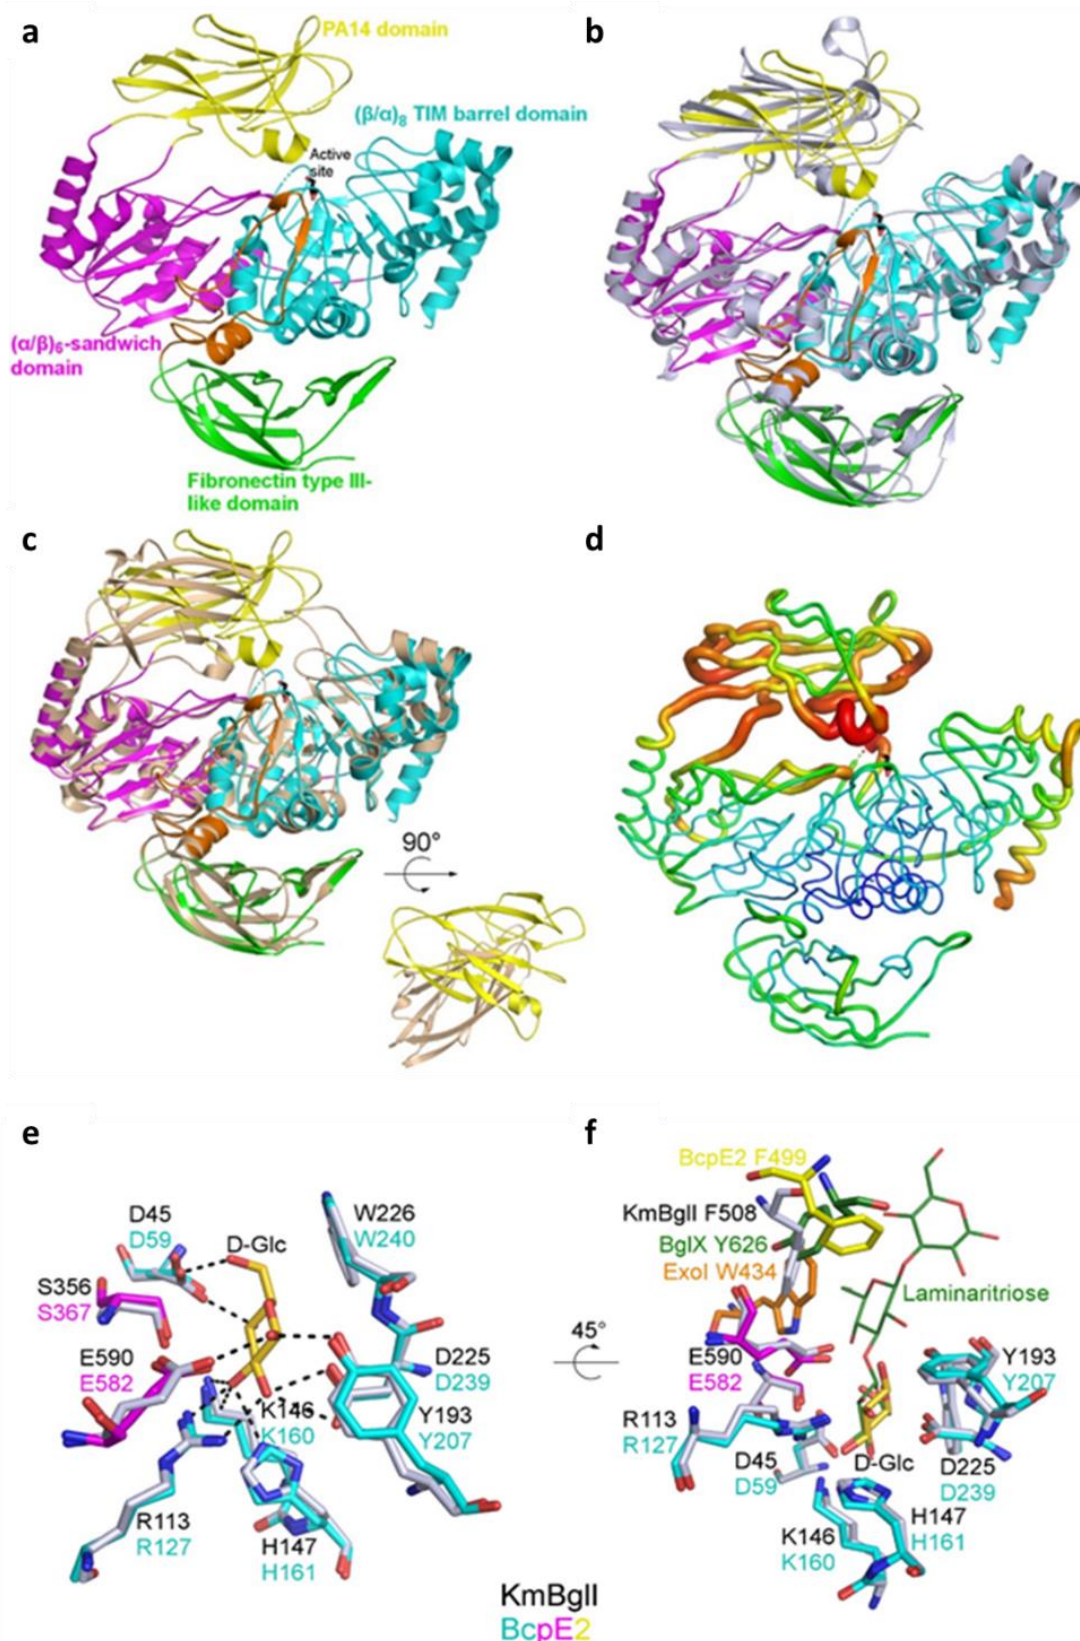

119

120 **Figure 1. Overall fold and active site description of BcpE2 of *S. scabiei*.** (a) Cartoon representation of the  
 121 BcpE2 structure. The glycerol molecule in the active site (black sticks) results from the cryo-protectant solution  
 122 used for freezing the crystal. (b) Superimposition of BcpE2 and KmBglI (light blue). (c) Superimposition of BcpE2  
 123 and DesR (light orange). Their PA14 are also shown with a 90° rotation to highlight the different orientations. (d)



124 Ribbon representation of BcpE2. The ribbon radius is proportional to the mean B-factor value of the residues and  
125 a rainbow coloring scheme (blue low B factor value to red high B-factor value). (e) Superimposition of the catalytic  
126 site of BcpE2 (residues are colored by domain with the same coloring scheme as in (b) with KmBglI (grey) in  
127 complex with D-Glucose (D-Glc in gold) in subsite -1. Hydrogen bonds with D-Glc are shown as black dashed  
128 lines. (f) Same as (e) with a 45° rotation and the addition of ExoI (orange) and the BglX:Laminaritriose complex  
129 (green) superimposed. The aromatic residues of subsite +1 of KmBglI and BglX are also shown as sticks, as well  
130 as their likely equivalent in ExoI and BcpE2. The position of F499 in BcpE2 (yellow sticks) comes from the PA14  
131 domain superimposed independently on the PA14 domain of KmBglI.

132

### 133 **The catalytic site of BcpE2**

134 Both KmBglI and DesR have been crystallized with a  $\beta$ -D-glucose molecule present in their  
135 active site (-1 subsite) <sup>21–23</sup>. This molecule corresponds to the buried end of the substrate, and,  
136 in KmBglI, it is found in a pocket made of 9 residues (7 of them being involved in hydrogen  
137 bonds) belonging to the  $(\alpha/\beta)_8$  TIM barrel and the  $(\alpha/\beta)_6$ -sandwich domains. These residues,  
138 which include the catalytic glutamate and aspartate responsible for the two-step double  
139 displacement mechanism <sup>24</sup>, are strictly conserved with a very similar orientation in DesR and  
140 BcpE2 (rmsd calculated for all non-hydrogen atoms of 0.48 Å and 0.60 Å respectively; **Figure**  
141 **1e**). **Figure S1** shows the structure-based sequence alignment of BcpE2 with homologous and  
142 biochemically characterized proteins (**Table S2**) that either display the highest structural or  
143 primary sequence similarity. The two catalytic residues – Asp239 and Glu582 – are strictly  
144 conserved in all homologous GH3s (**Figure S1**). These residues provide an ideal geometry to  
145 stabilize the five hydroxyl groups of glucose with at least one hydrogen bond and facilitate an  
146 efficient hydrolysis. The active site of BcpE2 also includes Asp59, Arg127, and three additional  
147 aromatic AAs, namely Tyr207, Trp240, and Phe499 which are generally conserved in the  
148 closest GH3-family enzymes (**Figure S1**).

149 In KmBglI, Phe508, which belongs to the PA14 domain, has been identified by site directed  
150 mutagenesis as important for substrate hydrolysis and is part of the subsite (+1)<sup>25</sup>. In BcpE2,  
151 Phe499 is equivalent when the two PA14 domains are superimposed independently (C $\alpha$  2 Å  
152 apart) but is shifted toward the position that the substrate would likely occupy when the entire  
153 structures are superimposed (C $\alpha$  5 Å apart). This positioning could be the result of the crystal  
154 packing and/or due to the flexibility observed. An aromatic residue at this position seems to be  
155 a common feature in GH3 enzymes but can come from different structural elements (**Figure**  
156 **S1**). For example, in the ExoI enzyme from barley<sup>26</sup>, it is located on a loop of the  $(\alpha/\beta)_6$ -  
157 sandwich domain, and in the dimer forming BglX from *Pseudomonas aeruginosa* <sup>24</sup>, it comes

158 from an extended loop of the second molecule of the dimer (Figure 1f). In BcpE2, the high B  
 159 factor values observed in this region and the likely related flexibility make it difficult to extract  
 160 additional information about substrate specificity in the (+1) subsite at this stage.

### 161 Seeking for the natural substrate(s) of BcpE2

162 Earlier work showed that BcpE2 displayed a strong hydrolytic activity on the synthetic  
 163 chromogenic substrate pNP $\beta$ G<sup>20</sup>, suggesting that the enzyme should target carbohydrates with  
 164 a terminal glucose attached by a  $\beta$ -1,4 linkage. According to KEGG pathway, BcpE2 of *S.*  
 165 *scabiei* 87-22 is suggested as candidate beta-glucosidase possibly involved in cyanoamino acid  
 166 metabolism ([https://www.genome.jp/kegg-bin/show\\_pathway?scb00460+SCAB\\_64101](https://www.genome.jp/kegg-bin/show_pathway?scb00460+SCAB_64101)). Two  
 167 cyanogenic glucosides were thus selected as possible targets of BcpE2, *i.e.*, amygdalin and  
 168 linamarin (Table 1). To help identifying other putative substrate(s) that could be hydrolyzed by  
 169 BcpE2, we generated a phylogenetic tree with BcpE2 of *S. scabiei* and the full-length sequences  
 170 of the fourteen closest characterized bacterial GH3-family  $\beta$ -glucosidases, and with five other  
 171 characterized bacterial GH3s with lower overall identity but with high query coverage and  
 172 containing the PA14 domain (Figure S2).

173 According to these *in silico* analyses combined to a literature survey, 14 candidate natural  
 174 substrates were selected for BcpE2 (Table 1). Most of them are  $\beta$ -1,4 linked heterosides  
 175 commonly found in plants, *i.e.*, compounds with glucose (or another carbohydrate moiety)  
 176 linked by a glycosidic bond to an aglycone. They belong to different types of plant heterosides  
 177 with extremely variable aglycone moieties, *i.e.*, i) aryl- $\beta$ -glucosides (arbutin, salicin), ii)  
 178 monolignol glucosides (p-coumaryl alcohol 4-O-glucoside, syringin, coniferin), iii) antho-  
 179 cyanosides (cyanin), iv) coumarin heterosides (esculin, scopolin), and cyanogenic glycosides  
 180 (linamarin, amygdalin).

181 **Table 1**  
 182 **Overview of the activity of BcpE2 and BglC on selected disaccharides and heterosides**

| Substrate     | Category                                 | TLC assays |       | Kinetic parameters (BcpE2) |                                     |                                                                       |                     |
|---------------|------------------------------------------|------------|-------|----------------------------|-------------------------------------|-----------------------------------------------------------------------|---------------------|
|               |                                          | BcpE2      | BglC  | K <sub>m</sub> (mM)        | k <sub>cat</sub> (s <sup>-1</sup> ) | K <sub>m</sub> /k <sub>cat</sub> (mM <sup>-1</sup> .s <sup>-1</sup> ) | K <sub>i</sub> (mM) |
| Cellobiose    | Disaccharides<br>( $\beta$ -1,4 glucose) | -          | +     | <sup>/20</sup>             | <sup>/20</sup>                      | <sup>/20</sup>                                                        | <sup>/20</sup>      |
| Xylobiose     | Disaccharides<br>( $\beta$ -1,4 xylose)  | -          | -     | NT                         | NT                                  | NT                                                                    | NT                  |
| Laminaribiose | Disaccharides<br>( $\beta$ -1,3 glucose) | ±          | +     | 6.557<br>± 1.410           | 8.74<br>± 1.02                      | <b>1.33</b>                                                           | NA                  |
| Gentiobiose   | Disaccharides<br>( $\beta$ -1,6 glucose) | ± / -      | ± / - | NT                         | NT                                  | NT                                                                    | NT                  |



|                                                |                           |       |           |                      |                     |               |       |
|------------------------------------------------|---------------------------|-------|-----------|----------------------|---------------------|---------------|-------|
| <b>Salicin</b>                                 | Aryl- $\beta$ -glucosides | +     | $\pm$     | 0.142<br>$\pm$ 0.030 | 53.20<br>$\pm$ 2.37 | <b>375.71</b> | NA    |
| <b>Arbutin</b>                                 | Aryl- $\beta$ -glucosides | +     | $\pm$ / - | 0.367<br>$\pm$ 0.080 | 43.17<br>$\pm$ 2.50 | <b>117.49</b> | NA    |
| <b><i>p</i>-coumaryl alcohol 4-O-glucoside</b> | Monolignol glucosides     | +     | $\pm$     | 0.236                | 77.15               | <b>326.49</b> | 0.593 |
| <b>Syringin</b>                                | Monolignol glucosides     | +     | -         | 0.608<br>$\pm$ 0.166 | 26.43<br>$\pm$ 3.07 | <b>43.46</b>  | NA    |
| <b>Coniferin</b>                               | Monolignol glucosides     | +     | $\pm$     | 0.151<br>$\pm$ 0.043 | 83.30<br>$\pm$ 5.90 | <b>551.29</b> | NA    |
| <b>Cyanin (Cyanidin-3,5-di-O-glucoside)</b>    | Antho-cyanosides          | +     | -         | NT                   | NT                  | NT            | NT    |
| <b>Esculin</b>                                 | Coumarin heterosides      | +     | $\pm$     | NT                   | NT                  | NT            | NT    |
| <b>Scopolin</b>                                | Coumarin heterosides      | +     | +         | 0.356                | 191.90              | <b>539.65</b> | 0.152 |
| <b>Linamarin</b>                               | Cyanogenic glycosides     | +     | -         | NT                   | NT                  | NT            | NT    |
| <b>Amygdalin</b>                               | Cyanogenic glycosides     | $\pm$ | -         | NT                   | NT                  | NT            | NT    |
| <b>4-MUG</b>                                   | Aryl- $\beta$ -glucosides | +     | +         | NT                   | NT                  | NT            | NT    |

The TLC assays columns summarize the results displayed in Figure 2a by the attribution of qualitative hydrolysis scores for the two enzymes. ‘+’ indicates a complete hydrolysis, ‘ $\pm$ ’ indicates an incomplete hydrolysis, ‘ $\pm$ /-’ indicates weak hydrolysis, and ‘-’ indicates the absence of substrate hydrolysis (or glucose release). The kinetic parameters columns summarize the measured by initial velocities plotted as a function of the substrate concentration to obtain Henri-Michaelis-Menten or substrate inhibition curves fitted with GraphPad Prism (9.2.0). The error values of the  $K_m$ ,  $k_{cat}$ , and  $K_i$  values indicate the extent of the interval to be considered in order to determine the value with 95% confidence (asymptotic method). Abbreviations: pNP $\beta$ G: 4-Nitrophenyl  $\beta$ -D-glucopyranoside; 4-MUG: 4-methylumbelliferyl- $\beta$ -D-glucoside; NT: Not Tested; NA: Not Applicable. /, too weak activity for obtaining kinetic parameters (previously published in<sup>20</sup>).

183 The candidate substrates listed in Table 1 were tested to determine the ability of BcpE2 to  
 184 release their glycosidic moiety (Figure 2)  $\beta$ -glucosidase BglC was also included in our  
 185 enzymatic assays to compare the respective substrate specificities of each enzyme. Both pure  
 186 six histidine-tagged enzymes were incubated with the candidate substrates and reactions were  
 187 conducted at their optimal pH (7.5) and temperature (40°C) (optima deduced from results  
 188 presented in Figure S3 for BcpE2 and described in<sup>10</sup> for BglC). Reaction samples were spotted  
 189 on thin layer chromatography (TLC) plates and migrated in an elution chamber to separate  
 190 glucose (or other saccharides) from the remainder moieties of the substrate (Figure 2a).  
 191 Cellobiose was first tested as positive and negative control substrate for BglC and BcpE2,  
 192 respectively. Indeed, as shown in Figure 2a, glucose is only released from cellobiose when this

193 substrate is incubated with BglC. Other D-glucose disaccharides were tested, namely  
 194 gentiobiose (D-glucose linked in  $\beta(1\rightarrow6)$ ), and laminaribiose (D-glucose linked in  $\beta(1\rightarrow3)$ ).  
 195 Surprisingly, BglC could efficiently degrade laminaribiose whereas BcpE2 could only partially  
 196 degrade this substrate. Both enzymes were equally inefficient on gentiobiose where barely  
 197 perceptible amounts of glucose were released (Figure 2a). Neither BglC nor BcpE2 was active  
 198 on xylobiose suggesting that these enzymes cannot properly target D-xylose saccharides.

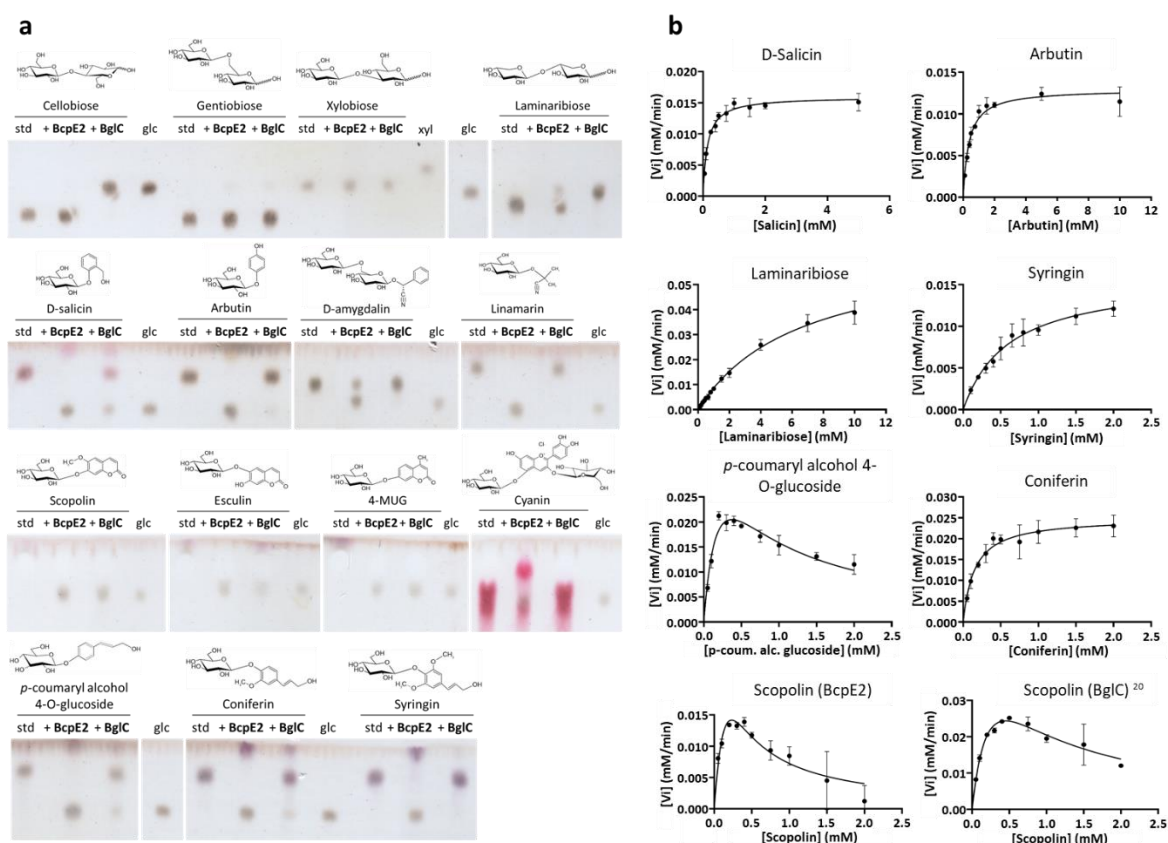

199  
 200 **Figure 2. Substrate specificities of BcpE2 and BglC.** (a) TLC plates revealing the release of glucose (glc) after  
 201 incubation of a variety of substrates (5 mM) with BcpE2 or BglC (1  $\mu$ M) compared to the intact substrate (standard  
 202 (std)). The chemical structure is displayed above each substrate. (b) Non-linear regressions of the kinetic analyses  
 203 of BcpE2 towards seven substrates and one for BglC. Plots of the initial velocity ( $V_i$ , mM/min) estimated by the  
 204 rate of glucose released by the enzyme as a function of substrate concentrations (in mM). Individual values were  
 205 entered into the GraphPad Prism software (9.2.0) which fitted the data to the Henri-Michaelis-Menten model by a  
 206 non-linear regression. In the case of a decrease of the  $V_i$  at high substrate concentrations, the data were fitted to  
 207 the Substrate Inhibition model. Error bars display the standard deviation values determined for the  $V_i$  by three  
 208 replicates at each substrate concentration.

209  
 210 Strikingly, BcpE2 revealed to be active on all tested heterosides (Figure 2a). Complete  
 211 hydrolysis was observed for i) the two aryl- $\beta$ -glucosides salicin and arbutin, ii) the cyanogenic

212 glucoside linamarin, iii) the pink/purple anthocyanoside Cyanidin-3,5-di-O-glucoside chloride  
213 (Cyanin), iv) all three monolignol glucosides syringin, coniferin and *p*-coumaryl alcohol 4-O-  
214 glucoside, v) the coumarin heteroside esculin, and vi) the synthetic substrate 4-MUG (Figure  
215 2a). Significant yet incomplete hydrolysis by BcpE2 was also observed for the cyanogenic  
216 glucoside amygdalin. In contrast, BglC was inactive on most tested heterosides except the  
217 synthetic substrate 4-MUG, and scopolin as previously described<sup>18</sup>. Only partial substrate  
218 hydrolysis by BglC could be observed for esculin, coniferin, *p*-coumaryl alcohol 4-O-glucoside,  
219 and salicin (Figure 2a). Overall, we observed that the substrate specificity of BcpE2 is broad  
220 and often complementary to that of BglC (Table 1). Surprisingly and despite an extensive  
221 variability in the aglycone parts of the tested compounds, BcpE2 managed to generate glucose  
222 from all the heteroside substrates considered in this study.

223 After determining the best candidate substrates of BcpE2 by preliminary enzymatic assays on  
224 TLC, a subset of them was used to evaluate the kinetic parameters of BcpE2. The values of the  
225 Michaelis constant ( $K_m$ ), catalytic rate constant (or turnover;  $k_{cat}$ ) and catalytic efficiency  
226 ( $k_{cat}/K_m$ ) were determined for BcpE2 towards the seven following substrates: salicin, arbutin,  
227 laminaribiose, syringin, *p*-coumaryl alcohol glucoside, coniferin, and scopolin (Table 1) based  
228 on the non-linear regressions displayed in Figure 2b.

229 The best affinity of BcpE2 was – as indicated by the lowest  $K_m$  values – observed towards  
230 salicin and coniferin with a  $K_m$  of about 0.15 mM. The other substrates displayed values on the  
231 same order of magnitude, except laminaribiose for which the 6.557 mM estimated  $K_m$  value  
232 indicates a low affinity of the  $\beta$ -glucosidase for this substrate (as already anticipated from assays  
233 on TLC plates Figure 2a). Regarding the turnover parameter, the monolignol glucoside  
234 coniferin was the most efficiently hydrolyzed substrate with a  $k_{cat}$  value of 83.3 s<sup>-1</sup>. This  
235 heteroside thus had the highest catalytic efficiency at about 550 mM<sup>-1</sup>.s<sup>-1</sup>, surpassing salicin and  
236 *p*-coumaryl alcohol glucoside by some margin, and is thereby the best reported substrate for  
237 BcpE2.

238 While most of the tested substrates exhibited conventional Henri-Michaelis-Menten behavior  
239 upon hydrolysis by BcpE2, two heterosides revealed substrate inhibition, namely the *p*-  
240 coumaryl alcohol glucoside and scopolin (Figure 2b). Indeed, the monolignol glucoside *p*-  
241 coumaryl alcohol glucoside showed a decrease in the initial velocity at high substrate  
242 concentration. The calculated inhibition constant ( $K_i$ ) value for *p*-coumaryl alcohol glucoside  
243 was estimated at about 0.6 mM and the theoretical  $K_m$  and  $k_{cat}$  values without the inhibition  
244 phenomenon would be of 0.236 mM and 77.15 s<sup>-1</sup>, respectively. This suggests that this

245 monolignol glucoside is also a good substrate for BcpE2, yet at relatively low concentrations.  
246 Interestingly, scopolin is the only natural substrate to be hydrolyzed by both BcpE2 and BglC  
247 in the TLC experiment (Figure 2a). We therefore decided to evaluate their respective kinetic  
248 parameters to evaluate how efficiently they degrade this substrate. In order to obtain similar  
249 initial velocity values at low substrate concentrations, a concentration 20-times higher of BglC  
250 compared to BcpE2 was required, suggesting a much better  $k_{cat}$  for the latter. Also, as indicated  
251 by the aspect of the non-linear regressions in Figure 2b, both enzymes are subjected to substrate  
252 inhibition. However, the  $K_i$  value for BcpE2 appears to be lower thus indicating a stronger  
253 inhibition compared to BglC (Table 1).

254

### 255 **Production of BcpE2 is induced by the aryl- $\beta$ -glucoside salicin**

256 To validate the role of BcpE2 in heteroside degradation *in vivo*, it is mandatory to show that  
257 BcpE2 is produced when *S. scabiei* encounters these types of molecules in its environment.  
258 From all tested substrates that are best hydrolyzed by BcpE2, we chose salicin as a putative  
259 natural elicitor of BcpE2 production (also due to its availability in terms of cost and quantity)  
260 for our *in vivo* production assays. *S. scabiei* was cultivated under conditions that allow BglC  
261 production (minimal medium containing cellobiose) and/or with salicin as putative trigger for  
262 BcpE2 production. The different intracellular crude extracts were separated by anion exchange  
263 chromatography and the fractions obtained were first tested against pNP $\beta$ G as substrate to  
264 detect those containing  $\beta$ -glucosidases, and then subjected to targeted proteomics for the  
265 identification and quantification of BglC and BcpE2. The semi-quantitative abundances of  
266 BglC and BcpE2 under the three tested culture conditions are presented in Figure 3.

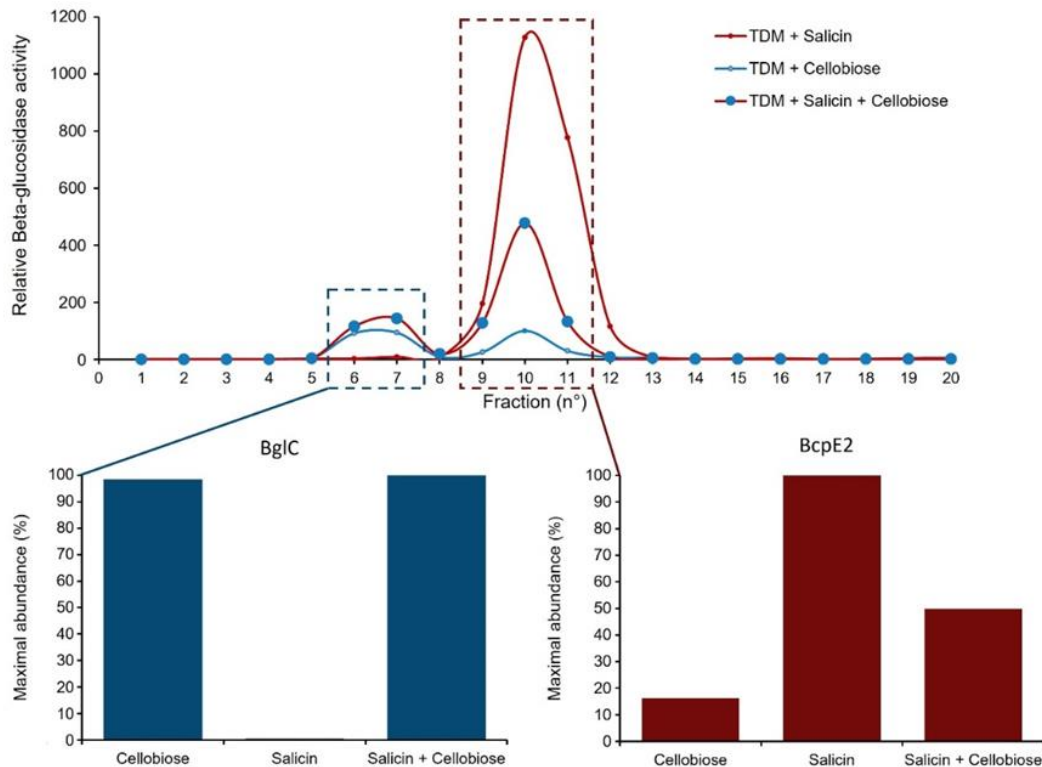

267

268 **Figure 3. Induction of the respective production of BglC and BcpE2 by cellobiose and salicin.** (Top panel)

269 Relative  $\beta$ -glucosidase activity in anion exchange chromatography fractions obtained from the full protein extracts  
270 of *S. scabiei* cultured in TDM medium supplemented with salicin (red trait), cellobiose (blue trait), or both  
271 substrates (red trait with blue circles). (Bottom panel) Relative abundance of BglC in the first active peak  
272 (fractions 6-7) and of BcpE2 in the second active peak (fractions 9-11) determined by targeted proteomics (LC-  
273 MRM (Liquid chromatography multiple reaction monitoring) after tryptic digestion of the protein fractions). In  
274 each culture condition, the relative protein abundance was reported to the maximal abundance measured for the  
275 given protein.

276

277 As previously reported, the production of BglC is triggered by the presence of cellobiose.  
278 Salicin was neither able to induce (when provided as unique carbon source) nor repress (when  
279 in combination with cellobiose) the production of BglC suggesting that the expression of *bglC*  
280 is not under the control of this aryl  $\beta$ -glucoside. By contrast, BcpE2 was instead maximally  
281 produced when salicin was supplied as unique carbon source and the supply of cellobiose in  
282 addition to salicin reduced BcpE2 production to half of this level. When salicin was not supplied  
283 in the culture media, the production levels of BcpE2 dropped to about 16% of its maximal  
284 production level. Our results show that the production of BcpE2 is indeed triggered upon  
285 sensing the presence of salicin, one of the substrates for which the enzyme displayed the most  
286 efficient catalytic properties.



## 287 Discussion

288 In this work, we report the structural and biochemical characterization of BcpE2, a GH3-family  
289  $\beta$ -glucosidase of the common scab pathogen *S. scabiei*. This protein displays low  
290 similarity compared to biochemically characterized enzymes of this family, indicating that  
291 BcpE2 could have novel functional specificities. The crystal structure of BcpE2 revealed the  
292 presence of four domains – including a rather uncommon PA14 domain predicted to be involved  
293 in substrate specificity – organized around a catalytic pocket, which can accommodate D-  
294 Glucose as buried residue. BcpE2 was highly active against a wide variety of plant heterosides  
295 mostly containing glucose as carbohydrate residue, with salicin and coniferin as the most  
296 efficiently hydrolyzed substrates.

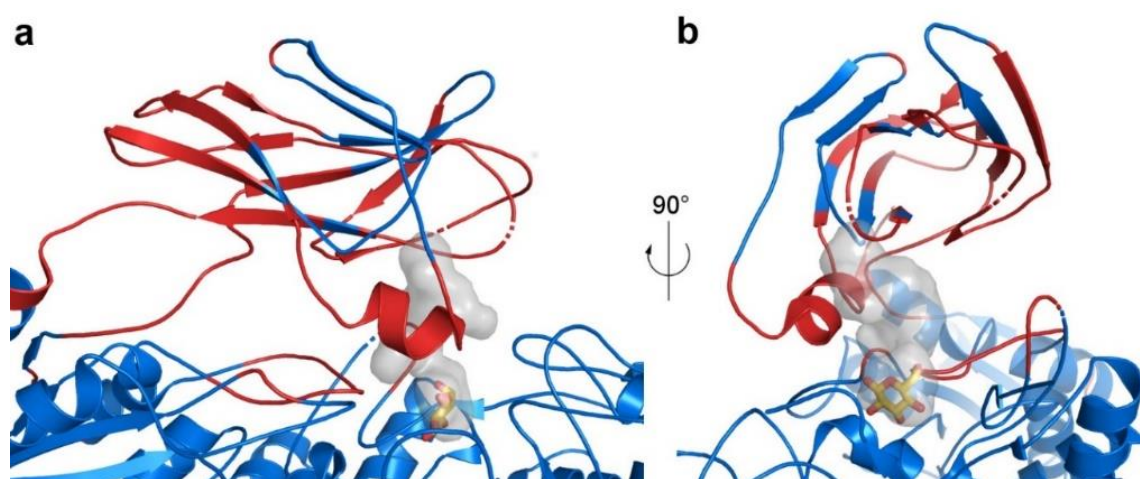

297  
298 **Figure 4. Active site flexibility of BcpE2.** (a) Cartoon representation of the BcpE2 active site and the PA14  
299 domain. Loops with missing amino acids are shown as dashed lines. Residues with a B factor of the  $C\alpha$  above 100  
300  $\text{\AA}^2$  are in red and the others in blue. The active site pocket is represented with a transparent surface with the D-  
301 glucose molecule in the (+1) subsite from the superimposed KmBglIII structure as yellow sticks. (b) Same as in (a)  
302 with a 90° rotation.

303  
304 The BcpE2 structure reveals two features likely contributing to its broad substrate specificity,  
305 *i.e.*, i) a wide cavity in the PA14 domain connected to the D-glucose specific subsite (-1), and  
306 ii) the high flexibility of this domain, especially the structure elements defining this cavity  
307 (Figure 4). Three of the four loops not fully defined in the electron density are indeed adjacent  
308 to the cavity, which is also surrounded by the residues with the highest B factors. This will  
309 therefore provide sufficient plasticity to accommodate the various substrates and an easy access  
310 to efficiently load the substrates and expel the products of the hydrolysis. Except for the



311 aromatic feature of Phe499, which seems to be a characteristic feature of GH3 enzymes, the  
312 residues of PA14 defining the cavity are not conserved even among closely related proteins  
313 (Figure S1). This could indicate that the main purpose of the cavity would be to hold the  
314 substrate shielded in the active site just long time enough for hydrolysis to take place, without  
315 contributing to the specificity except for setting a size limit.

316 At this stage, the perhaps most difficult question to answer is "which heteroside could escape  
317 hydrolysis by BcpE2", in other words, *to what extent can BcpE2 tolerate substrate promiscuity?*  
318 Glycosylated phytochemicals include phenylpropanoids, cyanogenic glucosides, coumarin  
319 heterosides, quinones, mono- or triterpenes, polyphenols, flavonoids (anthocyanosides,  
320 flavanols, isoflavonoids, flavonols and flavones), monolignols, amongst many others.  
321 Assessing the efficiency of BcpE2 to hydrolyze other substrates with an even wider spectrum  
322 of aglycone moieties will likely reveal the extent of its catalytic potential. A single heteroside,  
323 amygdalin, was not thoroughly hydrolyzed by BcpE2 (see TLC assay, Figure 2a), but it is also  
324 the only tested compound bearing gentiobiose instead of a glucose molecule as glycone. The  
325 gentiobiose disaccharide was poorly degraded by BcpE2 and it was thus not surprising that  
326 amygdalin was not thoroughly hydrolyzed. Despite this, the presence of the aromatic residue in  
327 the structure of this cyanogenic glucoside appears to enhance the activity of BcpE2 when  
328 compared to the hydrolysis of gentiobiose alone. The presence of at least one aromatic cycle in  
329 the chemical structure of the heterosides degraded by BcpE2 appears to be a common feature  
330 except for linamarin (Figure 2a). The fact that this cyanogenic glucoside is also efficiently  
331 hydrolyzed by BcpE2 suggests that the presence of an aromatic residue in the aglycone is not a  
332 mandatory feature to be accommodated as a substrate.

333

### 334 **Why is BcpE2 selected for compensating the loss of BglC?**

335 As cello-oligosaccharides are not natural substrates of BcpE2, the reason why the *bglC*-  
336 dependent mechanism of genetic compensation selected the product of *scab64101* as alternative  
337  $\beta$ -glucosidase was a complete mystery<sup>20</sup>. In light of the discovery of the substrate and enzymatic  
338 specificities of BcpE2, it is now easier to understand why the product of this gene was selected  
339 to compensate for the loss of *bglC*/BglC. Indeed, we now know that BcpE2 can compensate the  
340 impaired cello-oligosaccharide consumption by feeding glycolysis with glucose hydrolyzed  
341 from a multitude of plant-derived heterosides including monolignol glycosides which are some  
342 of the most ubiquitous molecules (Figure 5). BcpE2 would therefore act as a glucose scavenging  
343 enzyme, able to provide the most readily metabolized carbon source from a plethora of

344 compounds that *S. scabiei* would encounter during host colonization. For soil-dwelling  
345 saprophytic streptomycetes, BcpE2 would be equally important as most of the organic carbon  
346 are molecules generated from plant senescence. Indeed, genome mining of streptomycetes  
347 revealed that most of them possess an orthologue of BcpE2. It is also striking that BglC and  
348 BcpE2 possess complementary substrate ranges on the tested molecules as the compounds  
349 properly hydrolyzed by one are generally badly degraded by the other (Table 1). Overall, the  
350 multiplicity of possible substrates for BcpE2, and to a lesser extent for BglC, suggests that these  
351 enzymes would be part of a "Swiss Army Knife" for providing the bacteria the most readily  
352 mobilizable sugar from carbon rich environments. Our results demonstrate that the addition of  
353 salicin, one of the best substrates hydrolyzed by BcpE2, as supplement nutrient in the culture  
354 medium strongly induces the production of BcpE2 (Figure 3). In *S. venezuelae*, a similar  
355 situation has been reported where the production of two distinct  $\beta$ -glucosidases responds to  
356 either cellobiose or salicin. The enzyme induced by salicin hydrolyzes aryl  $\beta$ -glucosides but is  
357 poorly active on cellobiose while the other enzyme is highly active on – and induced by –  
358 cellobiose<sup>31</sup>. Due to their similarity in terms of catalytic specificity and responsiveness to either  
359 cellobiose or salicin, we speculate that these two enzymes of *S. venezuelae* are the orthologues  
360 of BglC (VNZ\_32510) and BcpE2 (VNZ\_10820), which share 70%, and 75% of identity with  
361 the proteins of *S. scabiei*, respectively. This finding further suggests that this type of GH3  $\beta$ -  
362 glucosidase is not exclusive to *Streptomyces* species that are phytopathogenic

363 However, the orthologue of BcpE2 found in *S. scabiei* is most likely involved in additional  
364 functions related to pathogenicity as it is the case for BglC<sup>10</sup>. Indeed, importantly, BcpE2 could  
365 also compensate for the loss of a recently discovered function of BglC, i.e., the glucosidase  
366 activity on the phytoalexin scopolin<sup>18</sup>. *in vitro* TLC assay revealed that scopolin is the only  
367 natural plant compound to be degraded in common by BcpE2 and BglC. Interestingly, the  
368 aglycone moiety of scopolin is scopoletin, which has been described as a strong inhibitor of  
369 thaxtomin A biosynthesis in *S. scabiei*<sup>19</sup>. Since scopoletin and scopolin have been reported to  
370 be produced by plant roots or tubers especially in response to the application of thaxtomin A or  
371 under stress conditions such as pathogen infection<sup>19,27–30</sup>, *S. scabiei* is very likely to encounter  
372 these molecules upon host colonization. It is therefore tempting to speculate that BglC and  
373 BcpE2 are both involved in the management of these compounds and that BcpE2 would be  
374 overproduced in the absence of BglC to take over the contribution of the latter.

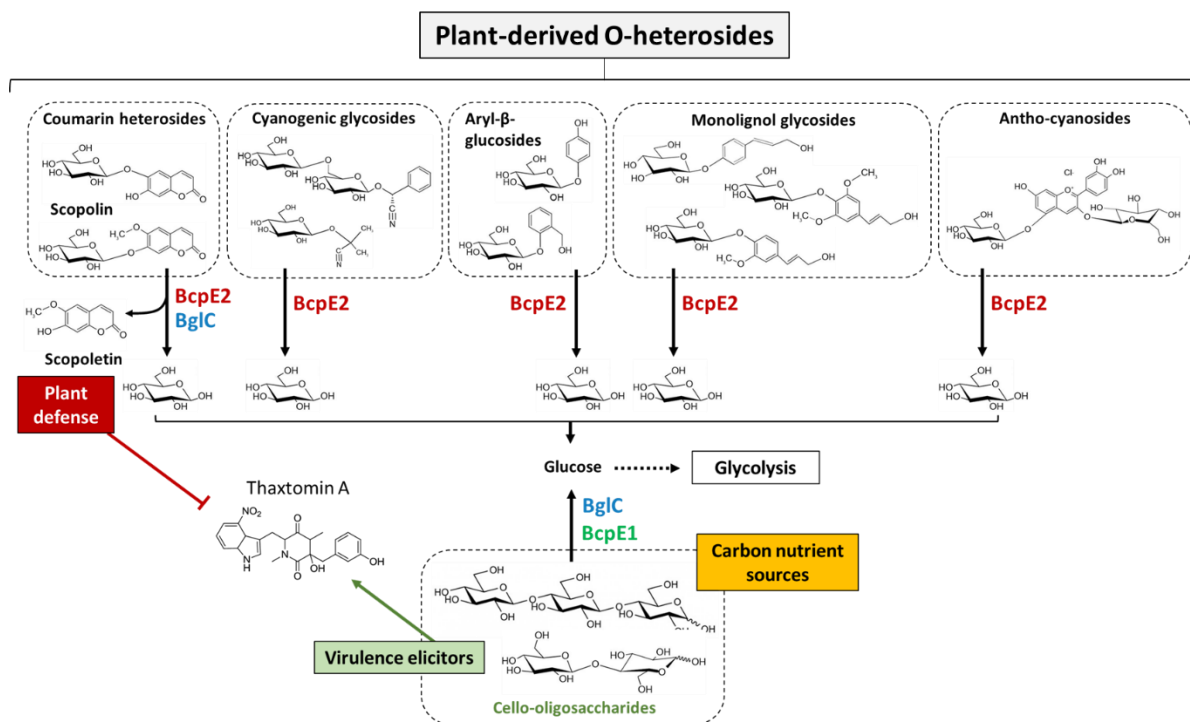

375

376 **Figure 5. BcpE1 and BcpE2-mediated enzymatic compensation for the loss of BglC.** BcpE1 (green) can  
 377 compensate the activity of BglC (blue) by generating glucose from the hydrolysis of cello-oligosaccharides  
 378 cellobiose and cellotriose. BcpE2 (red) can also fuel glycolysis by removing glucose from multiple plant  
 379 heterosides. In addition, BcpE2 can also compensate the role of BglC in plant defense mechanism by displaying a  
 380 substrate inhibition kinetic profile on scopolin, thereby generating the potent thaxtomin A production inhibitor  
 381 scopoletin.

382

### 383 Perspectives

384 An important question that remains to be answered is “*what are the environmental triggers that*  
 385 *induce the expression of bcpE2*”. In other words, “*does the substrate promiscuity of BcpE2*  
 386 *correlate with a mechanism of expression control of bcpE2 sensitive to multiple and dissimilar*  
 387 *compounds?*”. We are currently seeking for the transcription factor that controls the expression  
 388 of *bcpE2* orthologues in streptomycetes. Will this transcription factor be able to sense the  
 389 presence of multiple substrates of BcpE2 or instead only few structurally similar substrates that  
 390 would somehow witness for the possible presence of plant-heterosides? The answer to this  
 391 question is crucial for properly understanding the role of this versatile enzyme. In addition,  
 392 inactivation of orthologues of *bcpE2* in other model streptomycetes should provide further  
 393 insight into the importance of this promiscuous enzyme and explain the success of these  
 394 filamentous bacteria in colonizing plant-derived organic soils.

395

## 396 **Materials and methods**

### 397 **Strains, chemicals, and culture conditions**

398 Two strains of *Escherichia coli* were used in the present work: (i) DH5 $\alpha$  for routine molecular  
399 biology applications, and (ii) BL21(DE3) Rosetta<sup>TM</sup> (Novagen) for heterologous proteins  
400 production. Both *E. coli* strains were cultured in LB (BD Difco LB broth) medium  
401 supplemented with the appropriate antibiotics (kanamycin (50  $\mu$ g/mL), chloramphenicol (25  
402  $\mu$ g/mL)). *Streptomyces scabiei* 87-22 was routinely cultured at 28°C. Tryptic Soy Broth (TSB,  
403 Sigma-Aldrich, 30 g/L) was used for liquid pre-cultures. The modified TDM (thaxtomin  
404 defined medium<sup>14</sup>, (Johnson et al., 2007)) minimal medium was prepared as described in  
405 (Jourdan et al., 2018) and after autoclaving were supplemented with filter-sterilized carbon  
406 sources. The substrates used in this study were purchased from Carbosynth (Cellobiose,  
407 Amygdalin, Linamarin, Xylobiose, Laminaribiose, Gentiobiose, Salicin, Arbutin, and  
408 Syringin), or from Sigma-Aldrich (4-Nitrophenyl- $\beta$ -D-glucopyranoside (pNP $\beta$ G), Esculin,  
409 Cyanin chloride, 4-Methylumbelliferyl  $\beta$ -D-glucopyranoside (4-MUG), Coniferin (Abietin),  
410 and p-Coumaryl alcohol 4-O-glucoside).

### 411 **Heterologous production of His<sub>6</sub>-tagged proteins and purification**

412 BcpE2-His<sub>6</sub> and His<sub>6</sub>-BglC were produced in *E. coli* BL21(DE3) Rosetta<sup>TM</sup> transformed with  
413 plasmids pBDF004 and pSAJ022, respectively, and purified by nickel affinity chromatography  
414 as already described in<sup>10,20</sup>. The pure proteins were stored at -20 °C and used in HEPES buffer  
415 (50 mM, pH 7.5).

### 416 **Determination of the pH and temperature optima of BcpE2-His<sub>6</sub>**

417 The  $\beta$ -glucosidase activity was typically determined by the degradation of 4-Nitrophenyl- $\beta$ -D-  
418 glucopyranoside (pNP $\beta$ G). 95  $\mu$ L of a determined BcpE2-His<sub>6</sub> concentration diluted in HEPES  
419 buffer (50 mM, pH 7.5) were mixed with 5  $\mu$ L of pNP $\beta$ G (20 mM). After incubation at 25°C,  
420 the reaction was stopped by the addition of 100  $\mu$ L of Na<sub>2</sub>CO<sub>3</sub> (2 M). The release of *para*-  
421 nitrophenol was monitored by measuring the absorbance at 405 nm with a TECAN Infinite<sup>®</sup>  
422 200 PRO. The temperature optimum was determined by varying the incubation temperature  
423 from 5 to 60 degrees Celsius with 5°C increments. The pH optimum was determined by varying  
424 the pH of the reaction with the use of 3 distinct buffers, *i.e.*, (i) MES buffer (50 mM) for pH  
425 ranging between 5.0 and 6.5, (ii) HEPES buffer (50 mM) for pH ranging between 7.0 and 8.5,  
426 and (iii) CHES buffer (50 mM) for pH ranging between 9.0 and 10.0. The measured activity

427 was reported to the maximal value obtained in each experiment which was set to 100%. The  
428 results are presented in supplementary **Figure S3**.

#### 429 **TLC for hydrolysis of cello-oligosaccharides**

430 Semi-quantitative substrate degradation was assessed by thin layer chromatography (TLC).  
431 Reactions were carried out with the BcpE2-His<sub>6</sub> and His<sub>6</sub>-BglC enzymes (1 μM) and the  
432 substrates (5 mM) in HEPES 50 mM pH 7.5 at 40°C for 10 min. At the end of the reaction, the  
433 mixture was incubated for 5 min in a boiling water bath to inactivate the enzyme. 1-μL samples  
434 of the inactivated reaction mixtures were spotted next to undigested standards on aluminum-  
435 backed TLC plates (Silica gel Matrix, Sigma-Aldrich) and thoroughly dried. The protocol,  
436 adapted from <sup>32</sup>, consisted in eluting the loaded TLC plate in a TLC chamber filled with an  
437 elution buffer (Chloroform – Methanol – Acetic acid – Water (50:50:15:5 (v/v))). After air-  
438 drying the eluted plate, sulfuric acid (5%) in ethanol was sprayed onto the TLC plate and the  
439 excess liquid was drained. The revelation was conducted by heating the TLC plate on a hot  
440 plate.

#### 441 **Determination of kinetic parameters for BcpE2-His<sub>6</sub>**

442 The hydrolysis of non-chromogenic substrates for β-glucosidases was followed by glucose  
443 quantification, either by HPLC (see HPLC quantification of glucose) or with the D-Glucose  
444 HK Assay kit (Megazyme) following the microplate procedure. BcpE2-His<sub>6</sub> was mixed with  
445 the substrate at variable concentrations in HEPES 50 mM pH 7.5, and the incubation was  
446 conducted at 40°C for 4 min. The reaction was terminated by a 5-min incubation in a boiling  
447 water bath. At least 10 concentrations – if possible distributed around the K<sub>m</sub> value – were  
448 tested in triplicate for each substrate to estimate initial velocity values. The obtained data –  
449 initial velocity (V<sub>i</sub>, mM/min) in function of substrate concentration ([S], mM) – were fitted to  
450 the Henri-Michaelis-Menten equation  $V_i = (V_{max} * [S]) / (K_m + [S])$  using the GraphPad Prism  
451 (version 9.2.0) software. K<sub>m</sub> (mM), V<sub>max</sub> (mM/min), k<sub>cat</sub> (s<sup>-1</sup>) and the specificity constant  
452 (k<sub>cat</sub>/K<sub>m</sub> (mM<sup>-1</sup>s<sup>-1</sup>)) were determined for each substrate. Substrate inhibition constants were also  
453 determined with GraphPad Prism following the equation  $V_i = (V_{max} * [S]) / (K_m + [S] * (1 + [S]/K_i))$ .

#### 454 **HPLC quantification of glucose**

455 Glucose quantification was performed on a Waters HPLC device composed of a Separation  
456 Module (e2695) and a Refractive Index (RI) Detector (2414) set at 50°C. 35 μL of glucose-  
457 containing samples from terminated reactions were injected on a Aminex HPX-87P (Bio-Rad)  
458 column (300 x 7.8 mm) placed in an oven at 80°C. An isocratic flow of milli-Q water was

459 conducted for 20 min at a flow rate of 0.6 mL/min. The RI detector was set on channel 410 and  
460 sensitivity 256, and the measurements were expressed in RI Units (RIU). The peak areas  
461 associated with glucose ( $R_t = 11.6$  min) were integrated and converted into glucose  
462 concentrations based on a linear standard curve ranging from 0.1 ng/ $\mu$ L to 400 ng/ $\mu$ L following  
463 the equation:  $y = 644.09x - 3170.4$  (y being the Peak area ( $\mu$ V\*sec) and x being the glucose  
464 amount (ng) / 10  $\mu$ L injected).

#### 465 **Crystallization and structure determination of BcpE2-His<sub>6</sub>**

466 BcpE2 was concentrated to 17.4 mg/mL in HEPES 50 mM pH 7.5 and crystallized using the  
467 sitting-drop vapor diffusion method. 0.2  $\mu$ L of protein was mixed with 0.2  $\mu$ L of precipitant  
468 solution (methylpentane-2,4-diol (MPD) 45%, Tris-HCl 0.1M pH 8.5 and 0.2M ammonium  
469 acetate) and crystals grew at room temperature. The crystals were transferred into a  
470 cryoprotectant solution containing 50% MPD and 50% polyethylene glycol 400 before flash-  
471 freezing in a liquid nitrogen bath. Diffraction data were collected at the Soleil Synchrotron  
472 Proxima 2a beamline (Paris). Data were integrated and scaled using XDS (X-ray Detector  
473 Software<sup>33</sup>). Initial phases were obtained by molecular replacement using the structure of DesR  
474 from *S. venezuelae* as a search model (PDB code 4I3G<sup>22</sup>) using Phaser<sup>34</sup>. The structure was  
475 built with Coot (Crystallographic object-oriented toolkit<sup>35</sup>) and refined with BUSTER refine<sup>36</sup>.  
476 The figures were prepared using PyMOL (The PyMOL Molecular Graphics System, Version  
477 2.4.1 Enhanced for Mac OS X, Schrödinger, LLC.).

#### 478 **Computational tools**

479 The structure-based alignment was built using the MultAlin-ESPrpt (3.0) combined tool<sup>37,38</sup>  
480 using the structure of BcpE2 (PDB code: 7PPJ) as reference for positioning secondary structure  
481 elements. The sequences of seven additional characterized GH3 enzymes were included in the  
482 alignment (Table S2).

483 The phylogenetic tree was constructed using the phylogeny.fr tool with the “One Click” mode<sup>39</sup>.  
484 The repertoire of characterized bacterial and eukaryotic GH3 proteins was obtained from the  
485 CAZy database (accessed on August 27<sup>th</sup> 2021) and the amino acid sequences obtained were  
486 subsequently used in a BLASTp analysis against BcpE2 to select the appropriate proteins for  
487 the phylogenetic analysis (Table S2).

488 The search for PA14 domains was carried out using the MOTIF Search tool (Genome.jp) on  
489 the characterized bacterial and eukaryotic GH3 proteins from the CAZy database. The scan for  
490 motifs included the Pfam and NCBI-CDD databases in which the pfam07691 or 400161 and



491 214807 PSSM-Ids were searched for, respectively. In addition, the ScanProsite tool (Expasy)  
492 was used on the same amino acid sequences searching for the PA14 (PROSITE entry: PS51820)  
493 motif. A manual inspection was conducted to search for the presence of a PA14 domain in the  
494 closest GH3s (compared to BcpE2) that were not selected by the search tool. This inspection  
495 consisted in a comparison of the predicted secondary structures in the appropriate region of the  
496 proteins.

#### 497 **Determination of the intracellular $\beta$ -glucosidase activity**

498 Anion exchange chromatography (AXC) to obtain fractions of intracellular  $\beta$ -glucosidases was  
499 performed similarly to the method described in <sup>20</sup> with protein extracts prepared from cultures  
500 of *S. scabiei* 87-22 in TDM supplemented with salicin (0.1%) and/or cellobiose (0.1%). Briefly,  
501 48-hours pre-cultures in TSB were washed twice in TDM without carbon source. After  
502 resuspension of the mycelium in the conditions described above, the culture was carried out for  
503 7.5 hours at 28°C. After centrifugation, the mycelium pellet was resuspended in HEPES buffer  
504 (50 mM, pH 7.5) and disrupted with an Avestin Emulsiflex C3 homogenizer (3 lysis cycles).  
505 The soluble fraction was obtained by centrifugation of the lysed cell suspension and filtering  
506 (0.22  $\mu$ m cut-off) of the supernatant. Using an NGC Quest 10 (Bio-rad) and a HiTrap™ Q HP  
507 column (GE healthcare), protein fractions were generated by elution with a linear NaCl gradient  
508 (0 to 1 M). The  $\beta$ -glucosidase activity of each fraction was determined by the standard assay  
509 using pNP $\beta$ G as substrate (as described in <sup>10,20</sup>) and reported to the estimated protein content  
510 ( $Abs_{280nm}$ ) of the fraction. These relative activities were then normalized to the maximal activity  
511 observed in the second peak (corresponding to BcpE2) of the TDM + cellobiose condition.

#### 512 **Targeted proteomics analysis**

513 Collection of fractions by anion exchange chromatography and subsequent liquid  
514 chromatography – multiple reaction monitoring (LC-MRM) to monitor the relative abundance  
515 of BglC and BcpE2 in protein fractions was performed as previously described <sup>20,40</sup>, and  
516 detailed in the supplementary file **Table S3**.

#### 517 **Acknowledgements**

518 The work of Be.D. was supported by an aspirant grant from the FNRS (grant 1.A618.18), and  
519 a FNRS grant “Crédit de recherche” (grant CDR/OL J.0158.21) to S.R. Ba.D. was supported  
520 by a Bijzonder Onderzoeksfonds (BOF, grant 01B08915)-basic equipment from the Ghent  
521 University special research funds. F.K. and S.R. are research and senior-research associates of

522 the FRS-FNRS (Brussels, Belgium), respectively. We are very grateful to Sebastien Santini  
523 (CNRS/AMU IGS UMR7256) and the PACA Bioinfo platform (supported by IBISA) for the  
524 availability and management of the phylogeny.fr website, and to the assistance and support of  
525 the team of beamline proxima 2a at the Soleil synchrotron.

526

## 527 **References**

- 528 1. Hodgson, D. A. Primary metabolism and its control in streptomycetes: a most unusual group of  
529 bacteria. *Adv Microb Physiol* **42**, 47–238 (2000).
- 530 2. Book, A. J. *et al.* Evolution of High Cellulolytic Activity in Symbiotic *Streptomyces* through  
531 Selection of Expanded Gene Content and Coordinated Gene Expression. *PLoS Biol* **14**, e1002475  
532 (2016).
- 533 3. Lewin, G. R. *et al.* Evolution and Ecology of Actinobacteria and Their Bioenergy Applications.  
534 *Annu Rev Microbiol* **70**, 235–254 (2016).
- 535 4. Chater, K. F., Biró, S., Lee, K. J., Palmer, T. & Schrempf, H. The complex extracellular biology  
536 of *Streptomyces*. *FEMS Microbiol Rev* **34**, 171–198 (2010).
- 537 5. Lakhundi, S., Siddiqui, R. & Khan, N. A. Cellulose degradation: a therapeutic strategy in the  
538 improved treatment of *Acanthamoeba* infections. *Parasit Vectors* **8**, 23 (2015).
- 539 6. Takasuka, T. E., Book, A. J., Lewin, G. R., Currie, C. R. & Fox, B. G. Aerobic deconstruction of  
540 cellulosic biomass by an insect-associated *Streptomyces*. *Sci Rep* **3**, 1030 (2013).
- 541 7. Jourdan, S. *et al.* The CebE/MsiK Transporter is a Doorway to the Cello-oligosaccharide-  
542 mediated Induction of *Streptomyces scabies* Pathogenicity. *Sci Rep* **6**, 27144 (2016).
- 543 8. Schlösser, A., Jantos, J., Hackmann, K. & Schrempf, H. Characterization of the binding protein-  
544 dependent cellobiose and celotriose transport system of the cellulose degrader *Streptomyces*  
545 *reticuli*. *Appl Environ Microbiol* **65**, 2636–2643 (1999).
- 546 9. Schlösser, A., Kampers, T. & Schrempf, H. The *Streptomyces* ATP-binding component MsiK  
547 assists in cellobiose and maltose transport. *J Bacteriol* **179**, 2092–2095 (1997).
- 548 10. Jourdan, S. *et al.* Contribution of the  $\beta$ -glucosidase BglC to the onset of the pathogenic lifestyle of  
549 *Streptomyces scabies*. *Mol Plant Pathol* **19**, 1480–1490 (2018).
- 550 11. Spiridonov, N. A. & Wilson, D. B. Cloning and biochemical characterization of BglC, a beta-  
551 glucosidase from the cellulolytic actinomycete *Thermobifida fusca*. *Curr Microbiol* **42**, 295–301  
552 (2001).
- 553 12. Wach, M. J., Krasnoff, S. B., Loria, R. & Gibson, D. M. Effect of carbohydrates on the production  
554 of thaxtomin A by *Streptomyces acidiscabies*. *Arch Microbiol* **188**, 81–88 (2007).
- 555 13. Jourdan, S., Francis, I. M., Deflandre, B., Loria, R. & Rigali, S. Tracking the Subtle Mutations  
556 Driving Host Sensing by the Plant Pathogen *Streptomyces scabies*. *mSphere* **2**, e00367-16 (2017).

- 557 14. Johnson, E. G., Joshi, M. V., Gibson, D. M. & Loria, R. Cello-oligosaccharides released from host  
558 plants induce pathogenicity in scab-causing *Streptomyces* species. *Physiological and Molecular*  
559 *Plant Pathology* **71**, 18–25 (2007).
- 560 15. Francis, I. M., Jourdan, S., Fanara, S., Loria, R. & Rigali, S. The cellobiose sensor CebR is the  
561 gatekeeper of *Streptomyces scabies* pathogenicity. *mBio* **6**, e02018 (2015).
- 562 16. Planckaert, S. *et al.* Proteomic Response to Thaxtomin Phytotoxin Elicitor Cellobiose and to  
563 Deletion of Cellulose Utilization Regulator CebR in *Streptomyces scabies*. *J Proteome Res* **17**,  
564 3837–3852 (2018).
- 565 17. Deflandre, B. *et al.* The virulome of *Streptomyces scabiei* in response to cello-oligosaccharide  
566 elicitors. *Microbial Genomics* **8**, 000760.
- 567 18. Deflandre, B. & Rigali, S. Old Enzyme, New Role: The  $\beta$ -Glucosidase BglC of *Streptomyces*  
568 *scabiei* Interferes with the Plant Defense Mechanism by Hydrolyzing Scopolin. *Biophysica* **2**, 1–7  
569 (2021).
- 570 19. Lerat, S. *et al.* *Streptomyces scabiei* and its toxin thaxtomin A induce scopoletin biosynthesis in  
571 tobacco and *Arabidopsis thaliana*. *Plant Cell Rep* **28**, 1895–1903 (2009).
- 572 20. Deflandre, B. *et al.* Deletion of *bglC* triggers a genetic compensation response by awakening the  
573 expression of alternative beta-glucosidase. *Biochim Biophys Acta Gene Regul Mech* **1863**, 194615  
574 (2020).
- 575 21. Yoshida, E. *et al.* Role of a PA14 domain in determining substrate specificity of a glycoside  
576 hydrolase family 3  $\beta$ -glucosidase from *Kluyveromyces marxianus*. *Biochem J* **431**, 39–49 (2010).
- 577 22. Zmudka, M. W., Thoden, J. B. & Holden, H. M. The structure of DesR from *Streptomyces*  
578 *venezuelae*, a  $\beta$ -glucosidase involved in macrolide activation. *Protein Sci* **22**, 883–892 (2013).
- 579 23. Yoshida, E. *et al.* Purification, crystallization and preliminary X-ray analysis of beta-glucosidase  
580 from *Kluyveromyces marxianus* NBRC1777. *Acta Crystallogr Sect F Struct Biol Cryst Commun*  
581 **65**, 1190–1192 (2009).
- 582 24. Mahasenan, K. V. *et al.* Catalytic Cycle of Glycoside Hydrolase BglX from *Pseudomonas*  
583 *aeruginosa* and Its Implications for Biofilm Formation. *ACS Chem Biol* **15**, 189–196 (2020).
- 584 25. Yoshida, E. *et al.* Role of a PA14 domain in determining substrate specificity of a glycoside  
585 hydrolase family 3  $\beta$ -glucosidase from *Kluyveromyces marxianus*. *Biochemical Journal* **431**, 39–  
586 49 (2010).
- 587 26. Hrmova, M. *et al.* Structural Rationale for Low-Nanomolar Binding of Transition State Mimics to  
588 a Family GH3  $\beta$ -d-Glucan Glucohydrolase from Barley. *Biochemistry* **44**, 16529–16539 (2005).

- 589 27. Bednarek, P., Schneider, B., Svatos, A., Oldham, N. J. & Hahlbrock, K. Structural complexity,  
590 differential response to infection, and tissue specificity of indolic and phenylpropanoid secondary  
591 metabolism in *Arabidopsis* roots. *Plant Physiol* **138**, 1058–1070 (2005).
- 592 28. Clarke, D. D. The accumulation of scopolin in potato tissue in response to infection. *Physiological*  
593 *Plant Pathology* **3**, 347–358 (1973).
- 594 29. Nolte, P., Secor, G. A., Gudmestad, N. C. & Henningson, P. J. Detection and identification of  
595 fluorescent compounds in potato tuber tissue with corky patch syndrome. *American Potato*  
596 *Journal* **70**, 649–666 (1993).
- 597 30. Ward, J. L., Baker, J. M., Llewellyn, A. M., Hawkins, N. D. & Beale, M. H. Metabolomic  
598 analysis of *Arabidopsis* reveals hemiterpenoid glycosides as products of a nitrate ion-regulated,  
599 carbon flux overflow. *Proc Natl Acad Sci U S A* **108**, 10762–10767 (2011).
- 600 31. Chatterjee, S. & Vining, L. C. Glucose suppression of beta-glucosidase activity in a  
601 chloramphenicol-producing strain of *Streptomyces venezuelae*. *Can J Microbiol* **28**, 593–599  
602 (1982).
- 603 32. Gao, J. & Wakarchuk, W. Characterization of Five  $\beta$ -Glycoside Hydrolases from *Cellulomonas*  
604 *fimi* ATCC 484. *Journal of Bacteriology* **196**, 4103–4110 (2014).
- 605 33. Kabsch, W. XDS. *Acta Crystallographica Section D Biological Crystallography* **66**, 125–132  
606 (2010).
- 607 34. McCoy, A. J. *et al.* Phaser crystallographic software. *J Appl Cryst* **40**, 658–674 (2007).
- 608 35. Emsley, P., Lohkamp, B., Scott, W. G. & Cowtan, K. Features and development of Coot. *Acta*  
609 *Crystallogr D Biol Crystallogr* **66**, 486–501 (2010).
- 610 36. Blanc, E. *et al.* Refinement of severely incomplete structures with maximum likelihood in  
611 BUSTER-TNT. *Acta Crystallogr D Biol Crystallogr* **60**, 2210–2221 (2004).
- 612 37. Corpet, F. Multiple sequence alignment with hierarchical clustering. *Nucleic Acids Res* **16**,  
613 10881–10890 (1988).
- 614 38. Robert, X. & Gouet, P. Deciphering key features in protein structures with the new ENDscript  
615 server. *Nucleic Acids Res* **42**, W320–324 (2014).
- 616 39. Dereeper, A. *et al.* Phylogeny.fr: robust phylogenetic analysis for the non-specialist. *Nucleic Acids*  
617 *Res* **36**, W465–469 (2008).
- 618 40. Planckaert, S. *et al.* Identification of Novel Rotihibin Analogues in *Streptomyces scabies*,  
619 Including Discovery of Its Biosynthetic Gene Cluster. *Microbiol Spectr* **9**, e0057121 (2021).
- 620

621 **Supplementary data**

622 **Supplementary Table S1**

**Table S1 - Data collection and refinement statistics**

| <b>BcpE2 (PDB code7PJJ)</b>                                 |                           |
|-------------------------------------------------------------|---------------------------|
| <b>Data Collection:</b>                                     |                           |
| Wavelength                                                  | 0.98010                   |
| Space group                                                 | P 3 <sub>1</sub> 2 1      |
| a, b, c (Å)                                                 | 109.62, 109.62, 164.18    |
| $\alpha, \beta, \gamma$ (°)                                 | 90, 90, 120               |
| Resolution range (Å) <sup>a</sup>                           | 47.4 – 3.09 (3.27 – 3.09) |
| Rmerge (%) <sup>a</sup>                                     | 27.3 (222)                |
| $\langle I \rangle / \langle \sigma I \rangle$ <sup>a</sup> | 6.9 (0.9)                 |
| Completeness (%) <sup>a</sup>                               | 99.3 (96.6)               |
| Redundancy <sup>a</sup>                                     | 6.7 (6.4)                 |
| CC 1/2 <sup>a</sup>                                         | 0.991 (0.301)             |
| <b>Refinement:</b>                                          |                           |
| Resolution range (Å) <sup>a</sup>                           | 47.4 – 3.09 (3.2 – 3.09)  |
| No. of unique reflections <sup>a</sup>                      | 21414 (1981)              |
| R <sub>work</sub> (%) <sup>a</sup>                          | 22.3 (33.6)               |
| R <sub>free</sub> (%) <sup>a</sup>                          | 27.0 (35.5)               |
| No. Atoms                                                   |                           |
| Protein                                                     | 5904                      |
| Solvent                                                     | 14                        |
| RMS deviations from ideal stereochemistry                   |                           |
| Bond lengths (Å)                                            | 0.009                     |
| Bond angles (°)                                             | 1.00                      |
| Mean B factor (Å <sup>2</sup> )                             |                           |
| Protein                                                     | 90.9                      |
| Solvent                                                     | 94.3                      |
| Ramachandran plot:                                          |                           |
| Favored region (%)                                          | 92.7                      |
| Allowed regions (%)                                         | 6.4                       |
| Outlier regions (%)                                         | 0.9                       |

<sup>a</sup> Numbers in parenthesis refer to the highest resolution shell.

623

624



625 **Supplementary Figure S1. Structure-based sequence alignment of BcpE2 and its closest**  
 626 **characterized GH3 enzymes.**

627 The two catalytic residues – Asp239 and Glu582 – are strictly conserved in all homologous GH3s. The active site  
 628 of BcpE2 also includes Asp59, Arg127, and three additional aromatic AAs, namely Tyr207, Trp240, and Phe499  
 629 which are generally conserved. Asp59 and Arg127 show perfect conservation among all GH3 enzymes displayed  
 630 in Figure S1, and Trp240 was systematically found next to the catalytic aspartate. Tyr207 was found in all  
 631 sequences except in BglII of *Schwanniomyces etchellsii* which presented a leucine residue instead. The important  
 632 Phe499 residue was shared by most GH3-family enzymes considered but sometimes aligned at an adjacent position  
 633 as in BglII of *S. etchellsii* and KmBglII of *K. marxianus*. Only DesR from *S. venezuelae* and Bgl3B from  
 634 *Cellulomonas fimi* did not display any phenylalanine residue in this subregion.

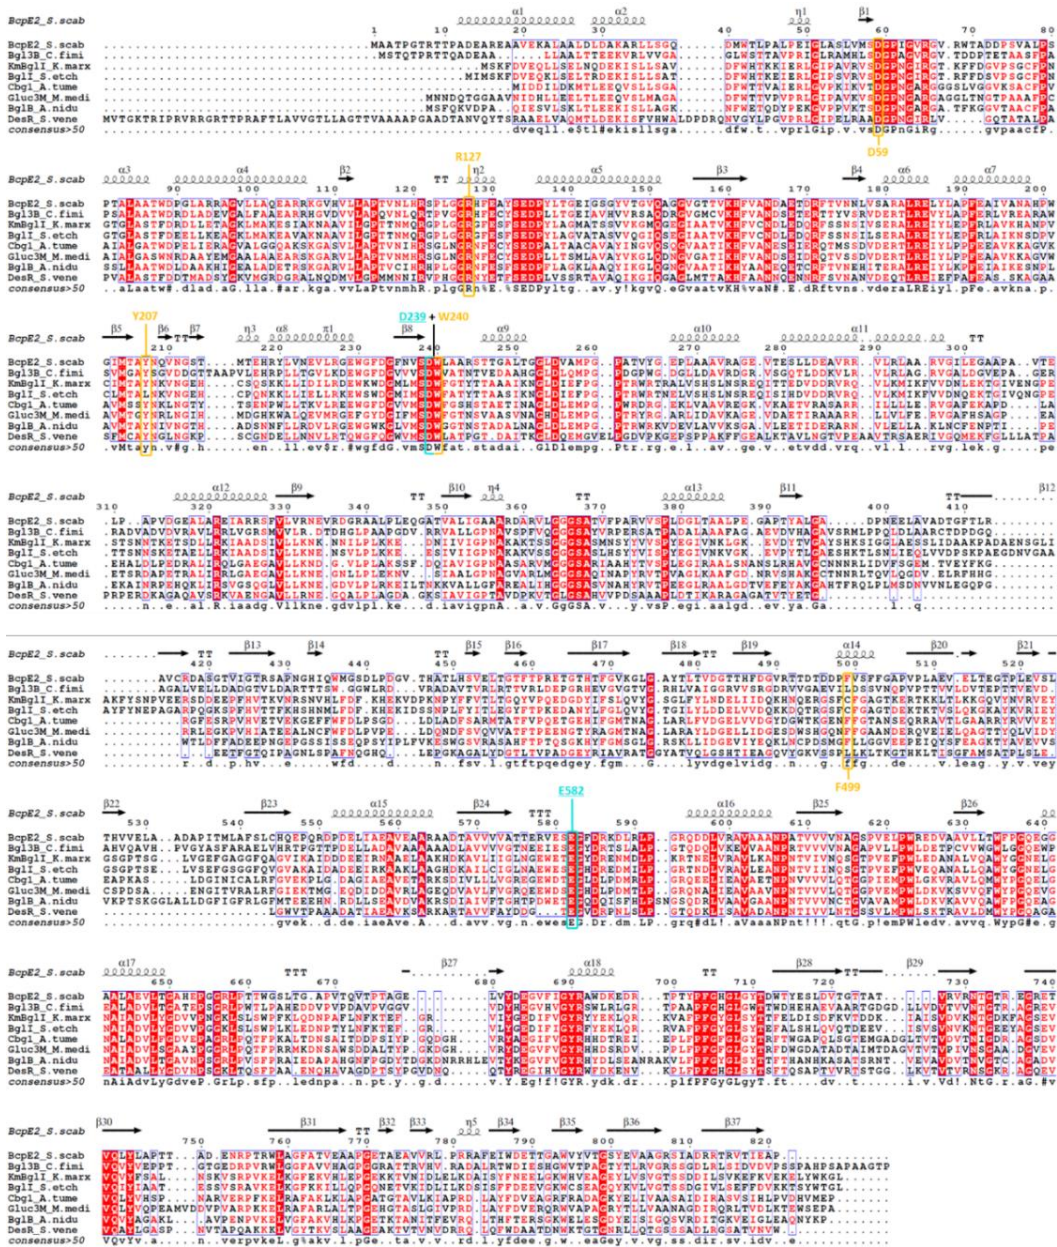

635  
 636 **Figure S1. Structure-based sequence alignment of BcpE2 and its closest characterized GH3 enzymes.** The residues  
 637 involved in the active site are indicated in yellow and the catalytic residues, also in the active site, are highlighted in cyan. The  
 638 red color on residues either indicate perfect conservation (red background) or biochemical similarity (red letter). Blue frames  
 639 highlight conserved regions for which a consensus motif is found. The “!”, “#”, and “%” symbols in the consensus sequence  
 640 shows the conservation of branched-chain, acidic or amide, and hydrophobic amino acids (AAs), respectively.

641 **Supplementary Figure S2. Phylogeny of BcpE2 and its closest characterized GH3-family  $\beta$ -**  
642 **glucosidases**

643 BcpE2 of *S. scabiei* is part of the clade that includes Bgl3B of *Cellulomonas fimi*, Cba from *Cellulomonas biazotea*,  
644 Gluc3M of *Martelella mediterranea*, and Cbg1 from *Agrobacterium tumefaciens*. Bgl3B of *Cellulomonas fimi*,  
645 and Cba from *Cellulomonas biazotea* are the closest partially characterized non-*Streptomyces* actinobacterial  
646 GH3s and have been reported to be active on gentiobiose and cellobiose as natural substrates, respectively (Gao  
647 & Wakarchuk, 2014; W. K. R. Wong et al., 1998). BcpE2 also shares a common ancestor with Gluc3M, a cold-  
648 active and alkali-stable  $\beta$ -Glucosidase from the Gram-negative rhizobiaceae *Martelella mediterranea*, and with  
649 the  $\beta$ -Glucosidase Cbg1 from *Agrobacterium tumefaciens*. Cbg1 is the second closest described homologue though  
650 it only has 39% and 55% of AA identity and similarity, respectively, compared to BcpE2. Interestingly, Cbg1 is  
651 involved in the virulence induction of some *A. tumefaciens* strains targeting Douglas fir trees (*Pseudotsuga*  
652 *menziesii*) by hydrolyzing the monolignol glucoside coniferin (Castle et al., 1992; Morris & Morris, 1990).  
653 Moreover, Cbg1, like BcpE2, is not properly active on cellobiose (Castle et al., 1992; Deflandre et al., 2020) but  
654 was instead reported to be active on salicin and arbutin. Beyond the synthetic substrates pNP $\beta$ G and 4-Nitrophenyl  
655  $\beta$ -D-galactopyranoside (pNP $\beta$ Gal), Gluc3M also exhibited significant activities toward salicin, and konjac powder  
656 (glucomannan) (Mao et al., 2010). As Cbg1 hydrolyzes the monolignol glucoside coniferin (Castle et al., 1992),  
657 the two other monolignol glucosides syringin and p-coumaryl alcohol 4-O-glucoside were also included as  
658 candidate substrates. The coumarin heteroside esculin, which is hydrolyzed by the fungal enzyme - KmBglII GH3  
659 enzyme (Yoshida et al., 2010) - belonging to the phylogenetic clade adjacent to the clade of BcpE2 (Figure S2)  
660 was selected as well. The coumarin heteroside scopolin was included because it is a new substrate hydrolyzed by  
661 BglC of *S. scabiei* (Deflandre et al. 2022). BcpE2 of *S. scabiei* 87-22 was also suggested by KEGG pathway as  
662 candidate beta-glucosidase possibly involved in cyanoamino acid metabolism ([https://www.genome.jp/kegg-  
663 bin/show\\_pathway?scb00460+SCAB\\_64101](https://www.genome.jp/kegg-bin/show_pathway?scb00460+SCAB_64101)). Two cyanogenic glucosides were thus also tested as possible  
664 targets of BcpE2, *i.e.*, amygdalin and linamarin. The glycone moiety of amygdalin is the disaccharide gentiobiose  
665 and its aglycone part is mandelonitrile, the cyanohydrin of benzaldehyde; linamarin is a glucoside of acetone  
666 cyanohydrin. These cyanide-bearing heterosides are plant phytoanticipins whose activation requires the action of  
667 a  $\beta$ -glucosidase to release the toxic aglycone moiety from the glycosidic residue. Finally, the natural plant  
668 anthocyanidin pigment cyanin, and the synthetic aryl- $\beta$ -glucoside substrate 4-methylumbelliferyl- $\beta$ -D-glucoside  
669 (4-MUG) were also tested.

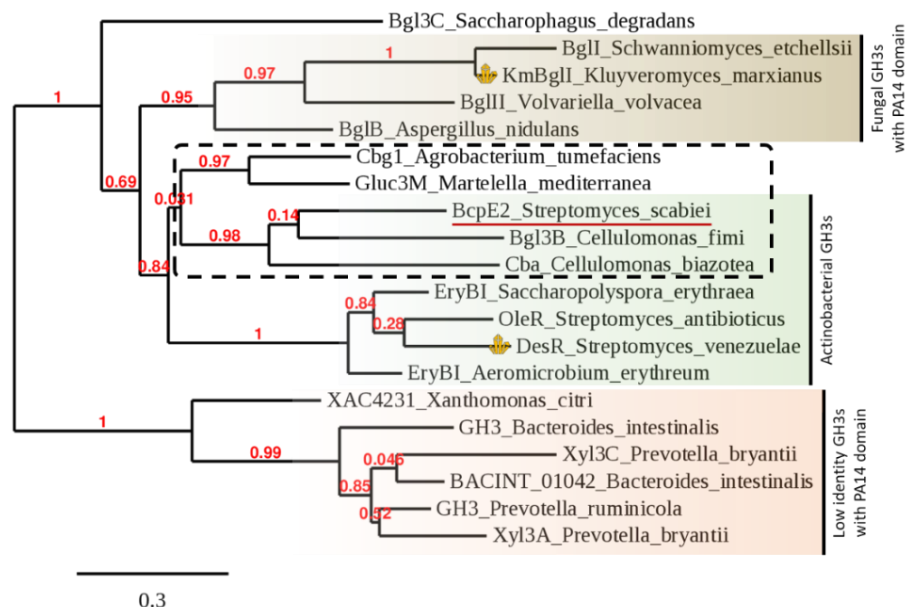

670  
671 **Figure S2. Phylogeny of BcpE2 and its closest characterized GH3-family  $\beta$ -glucosidases in order to identify possible**  
672 **candidate substrates of BcpE2.** The 19 closest characterized bacterial and fungal GH3-family beta-glucosidase have been  
673 selected based on BLASTp score and/or high query coverage. The dotted square delineates the clade with the closest  
674 characterized homologues of BcpE2.

675 **Supplementary Figure S3. Determination of the pH and temperature optima of BcpE2.**

676 The enzyme was obtained as BcpE2-His<sub>6</sub> by heterologous production in *E. coli* and subsequent purification by  
677 Nickel affinity chromatography as previously described (Deflandre et al., 2020). BcpE2-His<sub>6</sub> shows neutral and  
678 mesophilic pH and temperature parameters, with optimal activities displayed around pH 6.5-7.5 and 35-40°C,  
679 respectively (Figure S3). The optimal pH window was relatively narrow, since the enzyme displayed about 60%  
680 of its maximal activity at pH values only 0.5 above or below the 6.5-7.5 range (Figure S3, left panel). This pH  
681 range is in line with the cytoplasmic compartmentalization of BcpE2 in *S. scabiei*. Below 20°C and above 45°C,  
682 the activity rapidly dropped under 50% of the optimal activity (Figure S3, right panel). See the materials and  
683 methods section for the detailed protocol.

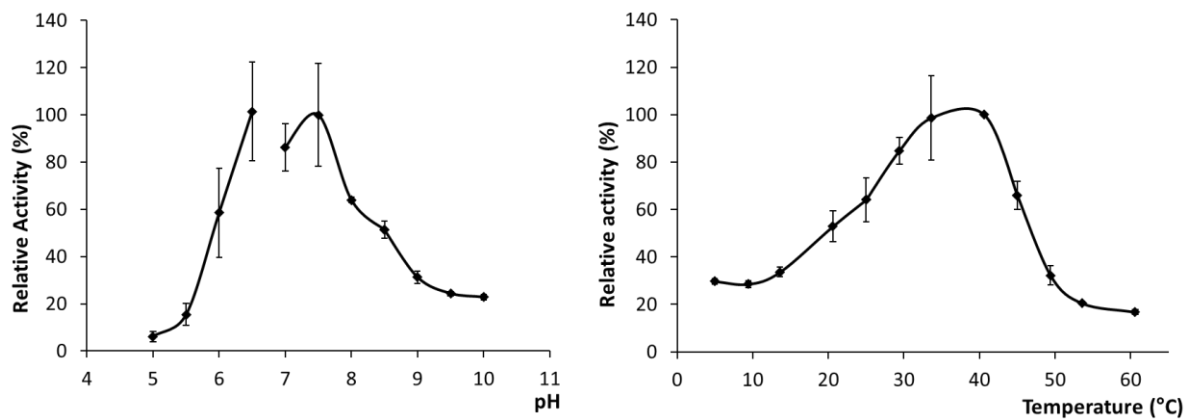

684

685 **Figure S3. Determination of the pH and temperature optima of BcpE2.** Relative activity assays with pNPβG  
686 as substrate, normalized to the maximal value measured in each assay. The influence of the pH (left panel) was  
687 assessed by increments of 0.5 from pH 5 to pH 10, and the temperature (right panel) was assessed by increments  
688 of 5°C from 5 to 60°C.

689

690

691



692 **Supplementary Table S2**

693 **Table S2 - Characteristics of GH3-family proteins homologous to BcpE2 (used for structure-based**  
 694 **alignment and phylogenetic tree construction)**

| Organism                                | GH3 name      | Query cov. (%) | Identity (%) | PA14 domain | NCBI protein ID | Ref.                              |
|-----------------------------------------|---------------|----------------|--------------|-------------|-----------------|-----------------------------------|
| <i>Streptomyces Phaeolivaceus</i>       | BcpE2-like    | 99             | 86           | Yes         | WP_152168420.1  | -                                 |
| <i>Streptomyces diastatochromogenes</i> | BcpE2-like    | 99             | 80           | Yes         | WP_094217992.1  | -                                 |
| <i>Streptomyces venezuelae</i>          | BcpE2-like    | 99             | 75           | Yes         | WP_150183929.1  | -                                 |
| <i>Streptomyces rimosus</i>             | BcpE2-like    | 96             | 66           | Yes         | WP_033029078.1  | -                                 |
| <i>Streptomyces coelicolor</i>          | BcpE2-like?   | 96             | 47           | Not found   | WP_011031033.1  | -                                 |
| <i>Cellulomonas fimi</i>                | Bgl3B         | 96             | 44           | Not found   | AEE44608.1      | (Gao & Wakarchuk, 2014)           |
| <i>Agrobacterium tumefaciens</i>        | CbgI          | 97             | 39           | Yes         | AAA22082.1      | (Castle et al., 1992)             |
| <i>Marteella mediterranea</i>           | Gluc3M        | 95             | 39           | Yes         | ADC53302.1      | (Mao et al., 2010)                |
| <i>Aspergillus nidulans</i>             | BglB          | 97             | 36           | Yes         | EAA65189.1      | (Bauer et al., 2006)              |
| <i>Schwanniomyces etchellsii</i>        | BglI          | 96             | 34           | Yes         | ACF93471.1      | (Pandey & Mishra, 1997)           |
| <i>Cellulomonas biazotea</i>            | Cba           | 96             | 41           | Not found   | AAC38196.1      | (W. K. R. Wong et al., 1998)      |
| <i>Kluyveromyces marxianus</i>          | KmBglI        | 96             | 33           | Yes         | ACY95404.1      | (Yoshida et al., 2010)            |
| <i>Volvariella volvacea</i>             | BglII         | 97             | 35           | Yes         | AAG59831.1      | (X. Li et al., 2005)              |
| <i>Saccharophagus degradans</i>         | Bgl3C         | 98             | 32           | Yes         | ABD81934.1      | (H. Zhang et al., 2011)           |
| <i>Saccharopolyspora erythraea</i>      | EryBI         | 97             | 35           | Yes         | CAA74702.1      | (Jakeman & Sadeghi-Khomami, 2011) |
| <i>Streptomyces antibioticus</i>        | OleR          | 92             | 37           | Yes         | AAC12650.1      | (Quiros et al., 1998)             |
| <i>Aeromicrobium erythreum</i>          | EryBI         | 94             | 37           | Yes         | AAU93797.1      | (Reeves et al., 2008)             |
| <i>Streptomyces venezuelae</i>          | DesR          | 95             | 35           | Yes         | ACR54627.1      | (Zmudka et al., 2013)             |
| <i>Spirochaeta thermophila</i>          | STHERM_c14600 | 76             | 44           | Not found   | ADN02400.1      | (Angelov et al., 2011)            |
| <i>Dictyoglomus turgidum</i>            | Dtur_0219     | 75             | 41           | Not found   | ACK41548.1      | (Kim et al., 2011)                |
| <i>Herpetosiphon aurantiacus</i>        | HaGH03        | 76             | 43           | Not found   | ABX04075.1      | (R.-F. Wang et al., 2015)         |
| <i>Hungateiclostridium thermocellum</i> | BglB          | 74             | 40           | Not found   | ABN52488.1      | (Romaniec et al., 1993)           |
| <i>Paenibacillus xylanilyticus</i>      | BglA          | 79             | 38           | Not found   | AFC68969.1      | (D.-J. Park et al., 2013)         |
| <i>Thermoclostridium stercorarium</i>   | Bgl3Z         | 78             | 39           | Not found   | CAB08072.1      | (Adelsberger et al., 2004)        |
| <i>Acetivibrio thermocellus</i>         | Bgl3B         | 74             | 39           | Not found   | CAA33665.1      | (Gräbnitz et al., 1989)           |
| <i>Xhantomonas citri</i>                | XAC4231       | 89             | 32           | Yes         | AAM39066.1      | (Vieira et al., 2021)             |
| <i>Cellulomonas fimi</i>                | Bgl3C         | 77             | 44           | Not found   | AEE47485.1      | (Gao & Wakarchuk, 2014)           |
| <i>Paenibacillus sp. TS12</i>           | GH3           | 78             | 38           | Not found   | BAC16750.1      | (Sumida et al., 2002)             |
| Uncultured bacterium                    | AS-Esc6       | 77             | 41           | Not found   | AHG23300.1      | (Biver et al., 2014)              |

|                                 |              |    |    |     |               |                        |
|---------------------------------|--------------|----|----|-----|---------------|------------------------|
| <i>Prevotella bryantii</i>      | Xyl3A        | 97 | 26 | Yes | ADD92014.1    | (Dodd et al., 2010)    |
| <i>Prevotella ruminicola</i>    | GH3          | 98 | 27 | Yes | ACN78955.1    | (Dodd et al., 2009)    |
| <i>Bacteroides intestinalis</i> | GH3          | 95 | 26 | Yes | EDV05842.1    | (Hong et al., 2014)    |
| <i>Bacteroides intestinalis</i> | BACINT_01042 | 92 | 27 | Yes | ZP_03013483.1 | (Pereira et al., 2021) |
| <i>Prevotella bryantii</i>      | Xyl3C        | 89 | 27 | Yes | ADD92016.1    | (Dodd et al., 2010)    |

695

696

697

698 **Supplementary Table S3**

699

**Transitions selected for MRM relative quantification of BglC/BcpE2  $\beta$ -glucosidases**

| Peptide        | Precursor ion mass (m/z) | CE (V) | Fragment y-ion mass (m/z)                                                                        |
|----------------|--------------------------|--------|--------------------------------------------------------------------------------------------------|
| <b>BglC</b>    |                          |        |                                                                                                  |
| LVDELLAK       | 450.7737 <sup>++</sup>   | 16     | 787.456 <sup>+</sup><br>688.3876 <sup>+</sup><br>573.3606 <sup>+</sup>                           |
| TDPVASLR       | 429.7376 <sup>++</sup>   | 15     | 642.3933 <sup>+</sup><br>545.3406 <sup>+</sup><br>446.2722 <sup>+</sup>                          |
| <b>BcpE2</b>   |                          |        |                                                                                                  |
| AGVLLAQEAR     | 514.2984 <sup>++</sup>   | 18     | 800.4625 <sup>+</sup><br>687.3784 <sup>+</sup><br>574.2944 <sup>+</sup>                          |
| DASGTVIGTR     | 488.7565 <sup>++</sup>   | 17     | 703.4097 <sup>+</sup><br>646.3883 <sup>+</sup><br>545.3406 <sup>+</sup>                          |
| AADTAVVVVATTER | 701.8805 <sup>++</sup>   | 25     | 973.5677 <sup>+</sup><br>874.4993 <sup>+</sup><br>775.4308 <sup>+</sup>                          |
| <b>BSA</b>     |                          |        |                                                                                                  |
| AEFVEVTK       | 461.7477 <sup>++</sup>   | 16     | 722.4083 <sup>+</sup><br>575.3399 <sup>+</sup><br>476.2715 <sup>+</sup>                          |
| QTALVELLK      | 507.8133 <sup>++</sup>   | 18     | 785.5131 <sup>+</sup><br>714.476 <sup>+</sup><br>601.3919 <sup>+</sup>                           |
| <b>Phos B</b>  |                          |        |                                                                                                  |
| VFADYEEYVK     | 631.8006 <sup>++</sup>   | 22     | 945.42 <sup>+</sup><br>830.3931 <sup>+</sup><br>667.3297 <sup>+</sup>                            |
| LLSYVDDEAFIR   | 720.8721 <sup>++</sup>   | 26     | 964.4734 <sup>+</sup><br>865.405 <sup>+</sup><br>750.3781 <sup>+</sup>                           |
| VLYPNDNFFEGK   | 721.8512 <sup>++</sup>   | 26     | 1067.479 <sup>+</sup><br>970.4265 <sup>+</sup><br>856.3836 <sup>+</sup><br>741.3566 <sup>+</sup> |

700

701 **Detailed protocol of the targeted proteomic approach.**

702 Fractions collected from the anion exchange chromatography (AXC) were subjected to trichloroacetic  
703 acid (TCA) precipitation. The AXC fractions were mixed with 100% (w/v) TCA solution (Sigma-  
704 Aldrich) (4:1), the proteins were precipitated overnight at 4°C and collected by centrifugation (16,000g;  
705 30 min, 4°C). The protein pellet was washed twice with ice-cold acetone and solubilized in 50 mM  
706 ammonium bicarbonate containing 2 M urea. Protein concentrations were estimated by Bradford's  
707 method (Coomassie Plus Protein Assay kit, Pierce). Dried protein (10  $\mu$ g) was solubilized in 2 M  
708 urea/50mM NH<sub>4</sub>HCO<sub>3</sub> spiked with bovine serum albumin (MS-grade protein standard) (1:250)  
709 (Thermo-Scientific), and denatured by heating to 80°C for 10 min. The solution was subsequently  
710 reduced with 5 mM dithiothreitol (Sigma-Aldrich) for 10 min at 60°C and alkylated with 15 mM  
711 iodoacetamide for 20 min at RT in the dark before digestion with trypsin (Promega, Madison, USA)



712 overnight at 37°C (1:50 w/w). Acidified digested samples were desalted using OMIX C18 pipette tips  
713 (Agilent). The desalted peptides were dried under vacuum and dissolved in 0.1% formic acid, 3% ACN  
714 and 10 fmol/μl phosphorylase B (Hi3 Phos B Standard, Waters).

715 For BglC and BcpE2 identification by MRM, samples (0.5 μg) were injected onto an ultraperformance  
716 liquid chromatography (UPLC) M-class system (Waters) and trapped on a 300 μm x 50 mm, 5 μm, 100  
717 Å Acquity UPLC M-Class Symmetry C18 Trap Colum (Waters). The washing step on the trap column  
718 was performed for 2 min with 3% B at a flow rate of 15 μL/min, with solvent A 0.1% HCOOH in H<sub>2</sub>O  
719 (Biosolve) and solvent B 0.1% HCOOH in ACN (Biosolve). Subsequently, the peptides were separated  
720 on a 150 μm x 100 mm, 1.8 μm HSS T3, iKey separation device in 10 min at a flow rate of 2 μL/min  
721 using a linear solvent B gradient (3-50%). The separated peptides were introduced into the IonKey  
722 source coupled to a Waters Xevo TQ-S triple-quadrupole mass spectrometer for detection of the analytes  
723 in the positive-ion mode (ESI+). The MRM mode with transitions of selected proteotypic peptides at a  
724 set cone voltage and different collision energies for each precursor, was used for detection,  
725 normalization (BSA) and MS performance check (Phos B) (Figure S3). Capillary voltage was set at  
726 3.5kV, the cone voltage at 35V and the source temperature at 120°C. In the collision cell, argon was  
727 introduced at a flow rate of 0.15 mL/min. Data were acquired with the developed MRM mode  
728 (MassLynx 4.1), subsequently uploaded into Skyline (Pino et al., 2020) for data analysis, and, subjected  
729 to a Savitsky-Golay Smoothing, the total area under the curve (AUC) for each peptide was calculated  
730 and normalized to BSA.

731

732

733
